# Supplementary material for: Patterns of sexual violence against adults and children during the COVID-19 pandemic in Kenya: a prospective cross-sectional study
Source: PubMed Central journal article supplement (PMC8423516; doi:10.1136/bmjopen-2021-048636), 2021-09-06
Supplement: bmjopen-2021-048636.draft_revisions.pdf [file bmjopen-2021-048636.draft_revisions.pdf]

# BMJ Open

BMJ Open is committed to open peer review. As part of this commitment we make the peer review history of every article we publish publicly available.

When an article is published we post the peer reviewers' comments and the authors' responses online. We also post the versions of the paper that were used during peer review. These are the versions that the peer review comments apply to.

The versions of the paper that follow are the versions that were submitted during the peer review process. They are not the versions of record or the final published versions. They should not be cited or distributed as the published version of this manuscript.

BMJ Open is an open access journal and the full, final, typeset and author-corrected version of record of the manuscript is available on our site with no access controls, subscription charges or pay-per-view fees (<http://bmjopen.bmj.com>).

If you have any questions on BMJ Open's open peer review process please email [info.bmjopen@bmj.com](mailto:info.bmjopen@bmj.com)

# BMJ Open

## Patterns of Violence Against Adults and Children During the COVID-19 Pandemic in Kenya

|                               |                                                                                                                                                                                                                                                                                                                                                                                                                                                                                                                                                                |
|-------------------------------|----------------------------------------------------------------------------------------------------------------------------------------------------------------------------------------------------------------------------------------------------------------------------------------------------------------------------------------------------------------------------------------------------------------------------------------------------------------------------------------------------------------------------------------------------------------|
| Journal:                      | <i>BMJ Open</i>                                                                                                                                                                                                                                                                                                                                                                                                                                                                                                                                                |
| Manuscript ID                 | bmjopen-2021-048636                                                                                                                                                                                                                                                                                                                                                                                                                                                                                                                                            |
| Article Type:                 | Original research                                                                                                                                                                                                                                                                                                                                                                                                                                                                                                                                              |
| Date Submitted by the Author: | 05-Jan-2021                                                                                                                                                                                                                                                                                                                                                                                                                                                                                                                                                    |
| Complete List of Authors:     | Rockowitz, Sarah; University of Birmingham, School of Psychology<br>Stevens, Laura M.; University of Birmingham, School of Psychology<br>Rockey, James; University of Birmingham, Birmingham Business School<br>Smith, Lisa; University of Leicester, Criminology<br>Richie, Jessica; University of Leicester<br>Colloff, Melissa; University of Birmingham, School of Psychology<br>Kanja, Wangu; Wangu Kanja Foundation<br>Cotton, Jessica; University of Birmingham, School of Psychology<br>Flowe, Heather; University of Birmingham, School of Psychology |
| Keywords:                     | COVID-19, PUBLIC HEALTH, Child protection < PAEDIATRICS                                                                                                                                                                                                                                                                                                                                                                                                                                                                                                        |
|                               |                                                                                                                                                                                                                                                                                                                                                                                                                                                                                                                                                                |

SCHOLARONE™  
Manuscripts

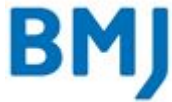

I, the Submitting Author has the right to grant and does grant on behalf of all authors of the Work (as defined in the below author licence), an exclusive licence and/or a non-exclusive licence for contributions from authors who are: i) UK Crown employees; ii) where BMJ has agreed a CC-BY licence shall apply, and/or iii) in accordance with the terms applicable for US Federal Government officers or employees acting as part of their official duties; on a worldwide, perpetual, irrevocable, royalty-free basis to BMJ Publishing Group Ltd ("BMJ") its licensees and where the relevant Journal is co-owned by BMJ to the co-owners of the Journal, to publish the Work in this journal and any other BMJ products and to exploit all rights, as set out in our [licence](#).

The Submitting Author accepts and understands that any supply made under these terms is made by BMJ to the Submitting Author unless you are acting as an employee on behalf of your employer or a postgraduate student of an affiliated institution which is paying any applicable article publishing charge ("APC") for Open Access articles. Where the Submitting Author wishes to make the Work available on an Open Access basis (and intends to pay the relevant APC), the terms of reuse of such Open Access shall be governed by a Creative Commons licence – details of these licences and which [Creative Commons](#) licence will apply to this Work are set out in our licence referred to above.

Other than as permitted in any relevant BMJ Author's Self Archiving Policies, I confirm this Work has not been accepted for publication elsewhere, is not being considered for publication elsewhere and does not duplicate material already published. I confirm all authors consent to publication of this Work and authorise the granting of this licence.

1  
2  
3  
4  
5  
6  
7 **Patterns of Violence Against Adults and Children**  
8 **During the COVID-19 Pandemic in Kenya**  
9

10  
11  
12  
13  
14 Sarah Rockowitz<sup>1</sup>, Laura M. Stevens<sup>1</sup>, James Rockey<sup>1</sup>, Lisa Smith<sup>2</sup>, Jessica Richie<sup>2</sup>, Melissa  
15 Colloff<sup>1</sup>, Wangu Kanja<sup>3</sup>, Jessica Cotton<sup>1</sup>, and Heather Flowe<sup>1</sup>  
16  
17

18  
19  
20  
21  
22 Corresponding author:

23 Heather Flowe

24 School of Psychology, University of Birmingham

25 52 Pritchatts Road, Birmingham, UK B15 2SA

26 h.flowe@bham.ac.uk  
27  
28  
29

30 University of Birmingham, School of Psychology, Birmingham, UK <sup>1</sup>

31 University of Leicester, School of Criminology, Leicester, UK<sup>2</sup>

32 The Wangu Kanja Foundation, Nairobi, Kenya<sup>3</sup>  
33  
34  
35  
36

37 Keywords: Gender-based violence, sexual abuse of child, rape, Kenya, exposure to violence  
38  
39  
40  
41  
42  
43  
44  
45  
46  
47  
48  
49  
50  
51  
52  
53  
54  
55  
56  
57  
58  
59  
60

Word count: 4,098

1 VIOLENCE DURING COVID-19 IN KENYA  
2  
34  
5 Author Note

6 We thank the Survivors of Sexual Violence Network in Kenya and the Social Justice  
7 Network Group for collecting the data for this study, and for the survivors who shared their  
8 stories with us.  
9

10 Our data are available  
11  
12 ([https://osf.io/bqrm2/?view\\_only=4536951b3a9640078649b2e4cdfc956f](https://osf.io/bqrm2/?view_only=4536951b3a9640078649b2e4cdfc956f)).

13 Sections of these data were included in a preliminary report and policy brief  
14 (<https://zenodo.org/record/3964124#.X-OVdGacYWo>); and  
15  
16 (<https://zenodo.org/record/3964162#.X-OVk2acYWo>)  
17  
18  
19  
20  
21  
22  
23  
24  
25  
26  
27  
28  
29  
30  
31  
32  
33  
34  
35  
36  
37  
38  
39  
40  
41  
42  
43  
44  
45  
46  
47  
48  
49  
50  
51  
52  
53  
54  
55  
56  
57  
58  
59  
60

1 VIOLENCE DURING COVID-19 IN KENYA  
23 **ABSTRACT**  
4

5 **Objectives** This study examined patterns of sexual violence against adults and children in Kenya  
6 during the COVID-19 pandemic to inform sexual violence prevention and protection efforts.  
7

8 **Design** A prospective cross-sectional research design was used.  
9

10 **Setting** Kenya  
11

12 **Participants** 317 adults, 224 children  
13

14 **Main Measures** Perpetrator and survivor demographic data, characteristics of the assault.  
15

16 **Results** Children were more likely than adults to be attacked during the daytime, by a single  
17 perpetrator rather than multiple perpetrators, and in a private as opposed to a public location.  
18 Children were violated most often by neighbors and family members, whereas adults were  
19 equally likely to be attacked by strangers and persons known to them. On average, the children in  
20 the sample were four years younger compared to the average age reported in national samples  
21 pre-pandemic (age 12 versus 16). Survivors were more likely to be female than male.  
22  
23  
24

25 **Conclusions** Patterns of sexual violence against adult and child survivors during the COVID-19  
26 pandemic are different, suggesting age-related measures are needed in national emergency plans  
27 to adequately address sexual violence during the pandemic.  
28  
29  
30  
31  
32  
33  
34  
35  
36  
37  
38  
39  
40  
41  
42  
43  
44  
45  
46  
47  
48  
49  
50  
51  
52  
53  
54  
55  
56  
57  
58  
59  
60

## VIOLENCE DURING COVID-19 IN KENYA

### **Strengths and limitations of this study**

This study was conducted in partnership with frontline, survivor-led organisations, using a prospective study design, which enabled the systematic and rapid study of sexual violence in Kenya during the pandemic, even though there were considerable physical distancing measures in place.

The data provide detailed information about survivors and perpetrators, including where and when incidents occurred, which enabled us to compare patterns of sexual violence in adults and children.

The sample was comprised of individuals who were seeking help in accessing vital services; therefore, inferences about patterns nationally in Kenya cannot be made because the data may not be a representative.

Information about whether patterns of sexual violence are changing during the pandemic remains unknown because sexual violence is underreported, and there is a need for real time data collection systems that gather and analyse detailed, longitudinal information about sexual violence incidents in low- and middle-income countries like Kenya.

## VIOLENCE DURING COVID-19 IN KENYA

**Patterns of Violence Against Adults and Children****During the COVID-19 Pandemic in Kenya**

Sexual and gender-based violence (SGBV) affects women in all societies. Nearly a third of ever-partnered women worldwide have experienced physical and/or sexual intimate partner violence at least once in their lives, and 7.2% of all women have experienced non-partner sexual violence.<sup>1</sup> This study focuses on Kenya, a country that has a long history of SGBV, which is exacerbated during times of national crisis, such as during election periods.<sup>2</sup> Previous conflicts and disasters have led to increased gender inequality, gender-based violence and other human rights violations, owing to disruptions in medical, protection, and legal services.<sup>3</sup> The arrival of COVID-19 in Kenya in early March 2020 marked the start of another national crisis, with more than 56,000 Kenyans becoming sick as of November 2020.<sup>4-6</sup> In late March, President Kenyatta issued a nation-wide curfew, with all non-essential travel banned between 7pm to 5am. Schools and non-essential businesses had to close, and travel in and out of the country was heavily restricted.<sup>5,6</sup> These measures have been extended and modified multiple times, and as of November 2020, the number of people who can gather in groups is still limited. Schools are still closed, while universities have been opened, and air travel restrictions have been lifted.<sup>6</sup> While the measures have undoubtedly curbed the spread of the disease, they seem to be compromising the safety and well-being of citizens. In particular, there have been widespread reports of increases in domestic and sexual violence during the COVID-19 crisis.<sup>6,7</sup> Indeed, there is worldwide concern that the pandemic will exacerbate gender inequality, and negatively impact the care and treatment women and girls receive in the aftermath of violence, owing to decreased access and funding following COVID-19 economic shocks.<sup>8</sup>



## VIOLENCE DURING COVID-19 IN KENYA

Around the world, humanitarian crises, such as natural disasters, conflict, and disease outbreaks, are associated with changing patterns of sexual violence.<sup>9-12</sup> After the 2010 earthquake in Haiti, for example, the odds of an adolescent girl in Haiti being sexually abused increased by 41%.<sup>11</sup> There have also been documented increases of violence against women after floods, hurricanes, and earthquakes in the United States, Canada, and Australia, as well as following the 2004 tsunami in Sri Lanka, and droughts in Ethiopia, Zimbabwe, and Kenya.<sup>13, 14</sup> Increased sexual violence occurs during conflicts, notably in Rwanda, Kosovo, and the Democratic Republic of the Congo (DRC). Sexual violence in these contexts has been used as a means of ethnic cleansing against the Tutsis, Kosovars, and Congolese women by the Hutus, Serbians, and Congolese soldiers, respectively.<sup>15-18</sup> These crimes are especially prevalent against women and children, and attacks by multiple perpetrators are common. In the DRC, for example, nearly 76% of women surveyed had experiences of rape that were consistent with the attack being used as a weapon of war, and 69% of women reported experiencing gang rape, with these incidents typically being perpetuated by three perpetrators on average.<sup>17</sup> These findings are consistent with research conducted in the Central African Republic, Libya, and Mali, which found that multiple-perpetrator rape was commonly reported by survivors.<sup>19</sup>

SGBV increases during disease outbreaks, with studies reporting increases in Sierra Leone, Liberia, and Guinea during the Ebola outbreaks in West Africa in 2014-2016, and especially high increases in teenage pregnancies were reported in Sierra Leone.<sup>12, 20</sup> Similarly, Zika and cholera outbreaks have been linked with increased incidence of domestic violence, and reductions in funding for and access to public health services.<sup>21</sup> Physical distancing measures implemented during pandemics are also thought to be responsible for changing patterns and increases in violence. For instance, lockdowns and curfews mean that people have to remain

## VIOLENCE DURING COVID-19 IN KENYA

indoors with abusers and are unable to access outside assistance because police and vital services are unavailable, and abusers can act with impunity.<sup>22,23</sup>

More research on SGBV during times of compounding crises is needed, however. Gender-based violence is highly stigmatized, which leads to underreporting, especially in developing countries that have high levels of gender inequality. Further, it is difficult to assess whether patterns and rates of SGBV are changing during times of crisis, owing to the unavailability of nationally representative data and a lack of up-to-date and recurring data collection, which would allow for examining SGBV trends in relation to humanitarian crises, and inform effective prevention, protection and responses.

During the current COVID-19 outbreak, seven months of lockdown measures, economic challenges, health concerns, and changing global relations have increased concerns that women have a heightened risk of SGBV. This violence during lockdown is being considered a shadow pandemic with the UN Population Fund estimating an additional 31 million cases of SGBV worldwide following 6-months isolation.<sup>23,24</sup> This increased risk of violence and abuse for women is coupled with other gendered impacts of the pandemic, including the gendered nature of healthcare (e.g., 70% of the healthcare and social services workforce globally are women) putting women at increased chance of exposure, increased caregiving responsibilities, and a loss of informal sector work and therefore financial freedom.<sup>25</sup> Governments in some countries, for example, have had to create or supply alternate housing for people fleeing abusive situations, as was the case with in Italy and France, with hotels being used as safe houses.<sup>26</sup> Social isolation policies have distinct impacts on children as well. Adolescent girls' absence from school, coupled with the lack of alternative safe venues, has been associated with increased vulnerability to sexual violence from family members and others, including neighbours and

## VIOLENCE DURING COVID-19 IN KENYA

community members.<sup>27</sup> As seen during the Ebola crisis, the closure of schools was associated with increased sexual violence against girls, adolescent pregnancy, and adolescent marriage.<sup>28</sup>

This study prospectively investigated patterns of sexual violence perpetrated against adults and children in Kenya during the COVID-19 pandemic. We analyse data from interviews with adult survivors and the guardians of child survivors conducted by human rights defenders during the pandemic. We focus on sexual violence because it has received less attention during the pandemic compared to other forms of gender-based violence. Further, research to date has not compared patterns of violence for adults and children. Doing so is critical because social isolation measures may differentially affect people in relation to age, and different measures may need to be put in place depending on the age group to prevent and respond to SGBV during COVID-19.

Based on the literature reviewed above, we predicted that there would be a greater number of women and girls violated compared to men and boys. Additionally, we anticipated there would be age-related differences in the types of locations in which sexual violence is occurring. Owing to school closures, and a lack of alternative safe spaces, we predicted that children would be at a greater risk than adults during the day, in private compared to public locations. We also compared the incidence of multiple versus single perpetrator attacks to better understand the nature of the violence occurring in relation to age. To our knowledge, no previous research has compared adults and children regarding the prevalence of violations committed by multiple perpetrators. Hence, no age group predictions were made concerning multiple perpetrators.

## METHOD

### Design

## VIOLENCE DURING COVID-19 IN KENYA

A quantitative between groups prospective research design was used. The criterion variable was age group (child or adult survivor). The predictor variables included the offense characteristics displayed in Table 1, which also summarises how the variables were operationalized.

For peer review only

**Table 1***Descriptions of how predictor variables were coded and operationalised*

| Variable                      | Definition                                                                                                                                                                                                                                                                                                                                                                                                                                                                                                                                                                                                                                        |
|-------------------------------|---------------------------------------------------------------------------------------------------------------------------------------------------------------------------------------------------------------------------------------------------------------------------------------------------------------------------------------------------------------------------------------------------------------------------------------------------------------------------------------------------------------------------------------------------------------------------------------------------------------------------------------------------|
| Female Survivor               | Whether the survivor was female (coded as 1) as opposed to male (coded as 0)                                                                                                                                                                                                                                                                                                                                                                                                                                                                                                                                                                      |
| Male Perpetrator              | Whether the perpetrator was male (coded as 1) as opposed to female (coded as 0)                                                                                                                                                                                                                                                                                                                                                                                                                                                                                                                                                                   |
| Daytime Attack                | Whether the attack occurred in the daytime (6:00am-5:59pm; coded as 1) as opposed to at night (6:00pm-5:59am; coded as 0)                                                                                                                                                                                                                                                                                                                                                                                                                                                                                                                         |
| Private or Public Location    | Whether the attack occurred in a private home (coded as 1) as opposed to a public location where the violation could have been witnessed or interrupted by a member of the public (coded as 0).                                                                                                                                                                                                                                                                                                                                                                                                                                                   |
| Private Location Type         | Private locations were further subdivided into victim residence (coded as 1 for victim residence, 0 for any other location public or private); perpetrator residence (coded as 1 for perpetrator residence, 0 for any other location public or private); or other residence (coded as 1 for other residence, 0 for any other location public or private).                                                                                                                                                                                                                                                                                         |
| Multiple Perpetrator          | Whether the attack was perpetrated by more than one perpetrator (coded as 1) as opposed to a singular perpetrator (coded as 0).                                                                                                                                                                                                                                                                                                                                                                                                                                                                                                                   |
| Known or Stranger Perpetrator | Whether the attack was perpetrated by someone known to the survivor (coded as 1) or a stranger (coded as 0)                                                                                                                                                                                                                                                                                                                                                                                                                                                                                                                                       |
| Perpetrator Relationship Type | Perpetrator relationship type was subdivided into neighbour (coded as 1 for neighbour, 0 for any other relationship type); stranger (coded as 1 for stranger, 0 for any other relationship type); family member (coded as 1 for family member, 0 for any other relationship type); acquaintance/friend (coded as 1 for acquaintance/friend, 0 for any other relationship type); spouse/husband/boyfriend (coded as 1 for spouse/husband/boyfriend, 0 for any other relationship type); authority figure (coded as 1 for authority figure, 0 for any other relationship type); or other (coded as 1 for other, 0 for any other relationship type). |

## Participants

Participants ( $N=787$ ) were survivors of sexual violence. All were residents of Kenya, living in 23 counties, and had contacted human rights defenders for assistance in obtaining vital services in the aftermath of sexual violence during the COVID-19 pandemic. The human rights defenders interviewed the survivors (or their legal guardians if they were under 18) about the offense upon intake. The interview protocol was informed by WHO ethical principles for research on SGBV and safety protocols developed by the human rights defenders for conducting their work with survivors.<sup>29</sup> The survivors were aged between 7 months and 72 years ( $M = 21.3$ ;  $SD = 9.4$ ).

Survivors were categorized into two age groups. Following definitions provided by WHO, the child group included survivors aged 17 years and younger, whereas the adult group included survivors aged 18 years and older.<sup>1</sup>

After excluding cases with missing data on the predictor variables, the final sample consisted of 224 survivors in the child group and 317 in the adult group. The participants in the final sample for the child group ranged in age from 8 months to 17 years ( $M = 12.6$ ,  $SD = 3.9$ ), 83% were girls, and 93% were perpetrated against by men, and for the adult group, ranged in age from 18 to 72 ( $M = 27.1$ ,  $SD = 8.1$ ), 92% were women, and 96% were perpetrated against by men.

## Materials

The data were obtained from records held by the human rights defenders who were assisting survivors in accessing vital services during the pandemic. They interviewed survivors about the incident and recorded information about the case on their standard intake form. They recorded the date, time, and location of the incident, and gave a free text description summarising the incident. The form also had specific items to document the number of perpetrators, the relationship between the survivor and perpetrator(s), the location of the attack, and the age and gender of the survivor

1  
2  
3 and perpetrator. Additionally, whilst not analysed in the current paper, any services (e.g., police,  
4  
5 medical, safe house) the survivor had accessed were also recorded.  
6

## 7 8 **Procedure**

9  
10 Each intake form was read by two members of the research team to create the dataset. They  
11  
12 coded the data using the criteria outlined in Table 1. If there was missing data on the form, the  
13  
14 team read the incident summary and attempted to complete the missing information.  
15

## 16 17 **Ethics**

18  
19 The confidentiality of the data was maintained by the research team, and participants were not  
20  
21 placed at risk of harm as a result of this study. The Kenyan Data Protection Act (2019) was adhered  
22  
23 to in the conduct of this research study.<sup>30</sup> The data belong to the Wangu Kanja Foundation and the  
24  
25 Sexual Violence Survivors' Network in Kenya, and permission to use the data was obtained from  
26  
27 these organisations to conduct the analyses. The research was also approved by the STEM Ethics  
28  
29 Committee at the University of Birmingham.  
30  
31

## 32 33 **Patient and Public Involvement**

34  
35 We relied heavily on input from civil society grassroots organisations who work on the  
36  
37 frontlines to assist survivors in accessing vital services in the aftermath of sexual violence,  
38  
39 including the Wangu Kanja Foundation and the Sexual Violence Survivors' Network in Kenya.  
40  
41 These organisations co-developed of the research questions, the study design, including the data  
42  
43 collection instruments, as well as participant recruitment, data collection, and manuscript  
44  
45 preparation. Their experience and knowledge with sexual violence in Kenya informed every  
46  
47 aspect of the project. Their reputation within the Kenyan communities enabled survivors to  
48  
49 disclose the incidents that occurred. The Wangu Kanja Foundation and Human Rights Defenders  
50  
51  
52  
53  
54  
55  
56  
57  
58  
59  
60

will be integral in disseminating the research findings to their networks and relevant stakeholders.

### Statistical analysis

As our main analysis, we used logistic regression with age group as the dependent variable to determine which offense characteristics significantly differentiated the child and adult groups. The child age group was coded as 1 in the analysis, whereas the adult age group was coded as 0. While our data contain detailed information about each attack we restrict our analysis to a limited number of binary variables in Table 1 as predictors. This is because there is a risk of a common-support problem if we use a finer grained analysis. For example, whilst we have detailed data on where survivors were attacked, or relationship with the perpetrator, we cannot exploit this as few in the child group were attacked going to work, or by their spouse or partner. To avoid this difficulty, we used the coarser coding of relationship, known versus stranger perpetrator, and whether the attack took place in a public place or in private. This ensured that there were sufficient numbers of both children and adults in all categories. We then supplement this analysis by tabulating the finer coding in Tables 2 and 3 respectively.

**Table 2**

*Distribution of Perpetrator Relationship to Survivor within Age Group*

|                          | Child<br><i>n</i> =224 | Adult<br><i>n</i> =317 |
|--------------------------|------------------------|------------------------|
| Neighbour                | 29%                    | 6%                     |
| Stranger                 | 25%                    | 41%                    |
| Family member            | 20%                    | 5%                     |
| Other                    | 12%                    | 16%                    |
| Acquaintance/friend      | 11%                    | 12%                    |
| Spouse/husband/boyfriend | 3%                     | 15%                    |
| Authority figure         | 2%                     | 6%                     |



**Table 3**  
*Distribution of Attack Location within Age Group*

|                              | Child<br><i>n</i> =224 | Adult<br><i>n</i> =317 |
|------------------------------|------------------------|------------------------|
| Perpetrator's house          | 41%                    | 20%                    |
| Public                       | 28%                    | 48%                    |
| Survivor's house             | 23%                    | 23%                    |
| Other house                  | 7%                     | 6%                     |
| Survivor/perpetrator's house | 1%                     | 3%                     |

We conducted preliminary analyses to identify which variables to enter into the model using Pearson's chi square tests for association. This allowed for testing whether the association between age group and each of the dichotomous variables was statistically significant. Only the variables that were significantly associated with age group were entered into the logistic regression model. To control for Type 1 errors, Bonferroni corrections were applied to the .05 alpha level (adjusted alpha = .008, with 6 variables). The strength of the relationship between the individual offense characteristics was assessed using Cramer's V, which measures the magnitude of the relationship between two categorical variables.<sup>31</sup> Values that fall between .40 and .60 are interpreted as large, whereas values that fall between .20 and .40 are interpreted as moderate in magnitude. Values smaller than .20 are regarded as associations that are small in magnitude. All analyses were conducted using SPSS version 26.

Our data are freely available: <https://osf.io/b9dzp/>.

## RESULTS

The results of the chi square analysis are presented in Table 4. Results indicate that children compared to adults were less likely to be female and less likely to be attacked by multiple perpetrators. Children compared to adults were more likely to be attacked in a private location, by

a known perpetrator and were more likely to be attacked in the daytime. The association between age and private location, and age and multiple perpetrators was moderately large, whereas the strength of the other associations, while statistically significant, was small in magnitude.

**Table 4**  
*Chi Square Outputs*

| Variable                                | Child<br><i>n</i> =224 | Adult<br><i>n</i> =317 | Pearson's Chi Square | <i>p</i> | Cramer's<br>V |
|-----------------------------------------|------------------------|------------------------|----------------------|----------|---------------|
| Female victim                           | 83%                    | 92%                    | 11.41                | .001     | .145          |
| Male Perpetrator                        | 92%                    | 94%                    | 1.17                 | .279     | .047          |
| Day                                     | 59%                    | 44%                    | 13.18                | <.001    | .156          |
| Private versus<br>Public Location       | 66%                    | 45%                    | 21.55                | <.001    | .200          |
| Multiple                                | 13%                    | 31%                    | 24.20                | <.001    | .212          |
| Known versus<br>Stranger<br>Perpetrator | 76%                    | 58%                    | 17.86                | <.001    | .182          |

In the logistic regression model, the variables that were statistically significant from the chi square results were entered as predictors (i.e., female survivor, daytime attack, private versus public location, multiple perpetrators, and known versus stranger perpetrator), and the dependent variable was age group. The overall model was statistically significant,  $\chi^2 (5, N = 541) 53.3, p < .001$ . According to Nagelkerke's  $R^2$ , 13% of the variability in age group was accounted for by the predictors in the model. Predictive accuracy improved from 59% to 64% using the model. The variables in our model were able to correctly classify 78% of cases perpetrated against adults, whereas 44% of cases in the child group were correctly classified using the variables in our model.

As shown in Table 5, all of the variables, except whether the crime was committed by a known perpetrator, were statistically significant. Child compared to adult survivors were 1.61 times more likely to be attacked during the day, and 1.72 times more likely to be attacked in private as opposed to in public. Child compared to adult survivors were also significantly less likely ( $OR=.458$ ) to be female, and less likely ( $OR=.528$ ) to be attacked by multiple perpetrators.

**Table 5**  
*Table of coefficient*

|                                         | df | Estimate | SE   | Wald $X^2$ | <i>p</i> |
|-----------------------------------------|----|----------|------|------------|----------|
| Female victim                           | 1  | -0.782   | 0.29 | 7.3        | .007     |
| Day                                     | 1  | 0.474    | 0.19 | 6.5        | .011     |
| Private versus<br>Public<br>Location    | 1  | 0.543    | 0.21 | 6.96       | .008     |
| Multiple                                | 1  | -0.638   | 0.27 | 5.77       | .016     |
| Known versus<br>Stranger<br>Perpetrator | 1  | 0.295    | 0.34 | 1.6        | .21      |

Tables 2 and 3 present a more detailed descriptive analysis of the child and adult cases on the relationship between the perpetrator and the victim, and the locations in which the attacks took place. As can be seen, age group was significantly associated with the relationship between the perpetrator and the survivor,  $X^2 (7, N = 541) = 107.84, p < .001$ . Children were most often victimized by neighbors, followed by strangers and family members, whereas adults were most often victimized by strangers followed by other types of perpetrators (customer, community member, friend of a friend) and spouses. Age group was also significantly associated with attack location,  $X^2 (4, N = 541) = 35.59, p < .001$ . Children were more most often attacked at the

1  
2  
3 perpetrator's house (41% of the cases), whereas adults were most often attacked in public locations  
4  
5 (48% of cases).  
6

## 7 8 **DISCUSSION**

### 9 10 **Summary of Key Findings**

11  
12 We compared patterns of sexual violence committed against adults and children in Kenya  
13 during the COVID-19 pandemic. The data arose from interviews conducted by human rights  
14 defenders with survivors, and describe the experiences of 541 survivors. We found that the  
15 children in our sample were on average four years younger compared to national surveys of  
16 children in Kenya.<sup>32, 33</sup> Further, compared to adults, children were more likely to be attacked  
17 during the day, in private as opposed to public locations, by lone perpetrators, and by neighbors.  
18  
19 In what follows, we discuss our findings in relation to existing research and draw implications  
20 for policy.  
21  
22  
23  
24  
25  
26  
27  
28  
29

### 30 31 **Comparisons to Current Literature**

32  
33 There were significant numbers of children in our sample, which is unsurprising, as  
34 approximately half of GBV survivors are children during humanitarian crises. However, the  
35 children in our sample were 12 years old on average, which is 4 years younger than the  
36 nationally representative samples taken pre-pandemic.<sup>32, 33</sup>  
37  
38  
39  
40  
41

42 We also found that children were 1.61 times more likely than adults to be attacked during the  
43 day. This could be attributed to the way that children and adults were spending their time during  
44 the pandemic. Because schools were closed, and there was no provision of any alternative safe  
45 spaces, children may have been often left alone or under the care or supervision of neighbors or  
46 community members, which may have made them more vulnerable to attack in some instances.  
47  
48  
49  
50  
51  
52  
53  
54 Children were more likely to be attacked in private as compared to public locations. Adults in  
55  
56  
57  
58  
59  
60

1  
2  
3 our sample were about equally likely to be attacked during the day as at night. Further, in  
4  
5 keeping with previous research, significantly more adults were violated by multiple perpetrators  
6  
7 compared to children.<sup>36</sup>  
8  
9

10 The proportion of boys in the children's group was larger than the proportion of men in the  
11  
12 adult's group. This may reflect differential rates of victimization for men compared to boys.  
13  
14 Another possible reason is that sexual violence against men compared to boys is disclosed less  
15  
16 often. The legal definition of rape in Kenya, like many countries, requires 'vaginal penetration',  
17  
18 which reinforces sociocultural notions that men cannot be sexually victimised.<sup>34</sup> Further, the  
19  
20 tendency for people to believe that the victimisation of men is harmless, coupled with self-blame  
21  
22 and fear on the part of victims that their community and family will react negatively towards  
23  
24 them, discourage men from seeking help, and reporting sexual offenses to the police.<sup>35</sup>  
25  
26  
27

28 The children and adults in our sample were more likely to be violated by someone they knew  
29  
30 than a stranger. For adults, perpetrators were most likely to be strangers, followed by neighbors  
31  
32 and community members, and spouses. The most common perpetrators for children were  
33  
34 neighbors, followed by strangers, and family members. Adults were violated by strangers more  
35  
36 frequently because they were often attacked when the opportunity struck, such as while walking  
37  
38 to or from work, whereas children were violated by neighbors when they were left under their  
39  
40 supervision due to school closures and their parents' job requirements.<sup>25</sup> Children were attacked  
41  
42 by neighbors and in the perpetrators' houses at higher rates than adults. Although both groups  
43  
44 were more likely to be violated by someone they knew as opposed to a stranger, and in both  
45  
46 groups more than half of the perpetrators were known to the survivor, there is a high proportion  
47  
48 of stranger compared to known assailants in both age groups. There were a number of instances  
49  
50  
51  
52  
53  
54  
55  
56  
57  
58  
59  
60

1  
2  
3 in our data set in which neighbors invited children to use a computer or access the Internet, and  
4  
5 then assaulted them once they were inside the neighbor's residence.  
6

### 7 8 **Strengths and Limitations**

9  
10 This research was conducted in partnership with frontline, survivor-led organisations, using a  
11  
12 prospective study design, which are key strengths. This enabled us to systematically and rapidly  
13  
14 study sexual violence in Kenya during the pandemic, even though there were considerable  
15  
16 physical distancing measures in place. Further, our data are unusually rich. The data provide  
17  
18 detailed information about survivors and perpetrators, where and when the incidents occurred,  
19  
20 which allowed for studying patterns of sexual violence. There are also several limitations of our  
21  
22 study to note. First, the sample was comprised of individuals who were seeking help in accessing  
23  
24 vital services. Hence, inferences about patterns nationally in Kenya cannot be made because the  
25  
26 data may not be a representative. Further, our data do not provide information about sexual  
27  
28 violence trends. Like many countries around the world, sexual violence is underreported, and  
29  
30 detailed, longitudinal information about sexual violence incidents are lacking. Consequently,  
31  
32 researchers struggle to make inferences about whether patterns of violence are changing during  
33  
34 COVID-19.<sup>37</sup> For example, the Demographic and Health Survey in Kenya, which is a nationally  
35  
36 representative survey of adults occurring every five years, does not gather in-depth information  
37  
38 about violations. Similarly, the national Violence Against Children Survey in Kenya, conducted  
39  
40 in 2010 and 2019, does not gather in depth information. We also had to rely on second-hand  
41  
42 accounts from guardians of sexual violence against children, owing to a lack of trained personnel  
43  
44 and adequate resources in Kenya for interviewing children. Some children were too young to be  
45  
46 interviewed, with the youngest victim being just seven-months old. Finally, our model better  
47  
48 accounted for patterns of violence against adults compared to children. This is because some of  
49  
50  
51  
52  
53  
54  
55  
56  
57  
58  
59  
60

1  
2  
3 the factors we analysed were more applicable to adults than children (e.g., employment, romantic  
4 relationships, being alone in public).  
5  
6

## 7 **Recommendations and Conclusion**

8  
9  
10 We urge policy makers to make sure that government COVID-19 emergency management  
11 and recovery planning adequately covers sexual and gender-based violence. This should include  
12 the provision of adequate alternative safe venues when schools are closed. Further, the  
13 implementation of emergency routes that enable survivors to access health, security, and  
14 protection services need to be a part of government plans. Survivors should also be exempted  
15 from lockdown requirements so they can access services. Further, the medico-legal response to  
16 SGBV can be strengthened by expediting restraining orders and prosecutions, and by  
17 establishing ‘one-stop’ centres to allow survivors to access essential services, and authorities to  
18 collect evidence, all in one location. In conclusion, governments must invest in real-time data  
19 collection and analysis systems to capture the nature of current sexual violence incidents and  
20 study regional trends. This would allow authorities to identify crime hot spots and violations  
21 being perpetrated by the serial offenders, and to monitor the accessibility of vital services to help  
22 ensure that survivors have support. These efforts should be survivor-centred, and involve  
23 survivors in the implementation and evaluation of the systems.  
24  
25  
26  
27  
28  
29  
30  
31  
32  
33  
34  
35  
36  
37  
38  
39  
40  
41  
42  
43  
44  
45  
46  
47  
48  
49  
50  
51  
52  
53  
54  
55  
56  
57  
58  
59  
60

## Declarations

### Authors' Contributions

HF and WK conceptualized and designed the data collection methods utilized in this project. SR and LMS drafted the protocol which was then reviewed by HF, MC, JR, and LS. All authors contributed to the reviewed draft version of the manuscript and approved the final version.

### Competing interests

The authors declare that they have no competing interests.

### Funding

This research was funded by ESRC Grant ES/T010207/1 (to H.D.F., M.F.C., J.C.R. and W.K.F.), the Institute for Global Innovation, University of Birmingham (to H.D.F, and W.K.F.), and a research grant from the Ring for Peace Foundation (to L.S.).

### Ethics

This research was approved by the University of Birmingham Ethics Committee (ERN\_19-0183).

### Availability of data and materials

All data generated during this study will be included in the published scoping review and will also be made available upon request.

review only



## References

1. Garcia-Moreno C, Pallitto C, Devries K, Stockl H, Watts C, Abrahams N. Global and regional estimates of violence against women: prevalence and health effects of intimate partner violence and nonpartner sexual violence. Geneva: WHO; 2013.
2. Odhiambo A. "They Were Men in Uniform" Sexual Violence Against Women and Girls in Kenya's 2017 Elections USA: Human Rights Watch 2017.
3. Bellizzi S, Nivoli A, Loretto L, Ronzoni AR. Human rights during the COVID-19 pandemic: the issue of female genital mutilations. *Public health (London)*. 2020;185:53-4.
4. Health Mo. First Case of Coronavirus Disease Confirmed in Kenya health.go.ke: Ministry of Health; 2020 [
5. Ritchie H, Ortiz-Ospina E, Beltekian D, Mathieu E, Hasell J, Macdonald B, et al. Kenya: Coronavirus Pandemic Country Profile ourworldindata.org: ourworldindata.org; 2020 [
6. Flowe H, Rockowitz S, Rockey J, Kanja W. Sexual and Other Forms of Violence During the COVID-19 Pandemic Emergency in Kenya. The University of Birmingham 2020.
7. Bearak M, Ombuor R. Kenya's coronavirus curfew begins with wave of police crackdowns. *The Washington post*. 2020.
8. UNFPA. As pandemic rages, women and girls face intensified risks 2020 [Available from: <https://www.unfpa.org/news/pandemic-rages-women-and-girls-face-intensified-risks>.
9. Marsh M, Purdin S, Navani S. Addressing sexual violence in humanitarian emergencies. *Glob Public Health*. 2006;1(2):133-46.
10. Dara Kay C, Ragnhild N. Sexual violence in armed conflict: Introducing the SVAC dataset, 1989–2009. *Journal of peace research*. 2014;51(3):418-28.
11. Sloan E, Killion C, Yarandi H, Sharps P, Lewis-O'Connor A, Hassan M, et al. Experiences of violence and abuse among internally displaced adolescent girls following a natural disaster. *J Adv Nurs*. 2017;73(12):3200-8.
12. Schwartz DA, Anoko JN, Abramowitz SA. Pregnant in the Time of Ebola Women and Their Children in the 2013-2015 West African Epidemic [text]. Cham: Springer International Publishing : Imprint: Springer,; 2019.
13. Fisher S. Violence Against Women and Natural Disasters: Findings From Post-Tsunami Sri Lanka. *Violence Against Women*. 2010;16(8):902-18.
14. Le Masson V, Lim S, Budimir M, Podboj J. Disasters and violence against women and girls. Can disasters shake social norms and power relations? London, England: Overseas Development Institute; 2016.
15. Watch HR. Kosovo: Rape as a Weapon of "Ethnic Cleansing. New York, NY; 2000.
16. Lives Blown Apart: Crimes Against Women in Times of Conflict. London, England: Amnesty International; 2004.
17. Initiative HH, Institute OS. Characterizing Sexual Violence in the Democratic Republic of the Congo: Profiles of Violence, Community Responses, and Implications for the Protection of Women. Cambridge, MA: Harvard University 2009.
18. Stark L, Wessells M. Sexual Violence as a Weapon of War. *JAMA*. 2012;308(7):677-8.

19. Guterres A. Conflict Related Sexual Violence: Report of the United Nations Secretary General. United Nations; 2019.
20. O'Brien M, Tolosa MX. The effect of the 2014 West Africa Ebola virus disease epidemic on multi-level violence against women. *International journal of human rights in healthcare*. 2016;9(3):151-60.
21. Chandan JS, Taylor J, Bradbury - Jones C, Nirantharakumar K, Kane E, Bandyopadhyay S. COVID-19: a public health approach to manage domestic violence is needed. *The Lancet Public Health*. 2020;5(6).
22. Mittal S, Singh T. Gender-Based Violence During COVID-19 Pandemic: A Mini-Review. *Frontiers in Global Women's Health*. 2020;1(4).
23. Bradbury-Jones C, Isham L. The pandemic paradox: The consequences of COVID-19 on domestic violence. *J Clin Nurs*. 2020;29(13-14):2047-9.
24. UNFPA. Millions more cases of violence, child marriage, female genital mutilation, unintended pregnancy expected due to the COVID-19 pandemic 2020 [Available from: <https://www.unfpa.org/news/millions-more-cases-violence-child-marriage-female-genital-mutilation-unintended-pregnancies>].
25. Simba H, Ngcobo S. Are Pandemics Gender Neutral? Women's Health and COVID-19. *Frontiers in Global Women's Health*. 2020;1(8).
26. Usher K, Bhullar N, Durkin J, Gyamfi N, Jackson D. Family violence and COVID-19: Increased vulnerability and reduced options for support . *International Journal of Mental Health Nursing*. 2020;29(4).
27. Onyango M, Resnick K, Davis A, Shah R. Gender-Based Violence Among Adolescent Girls and Young Women: A Neglected Consequence of the West African Ebola Outbreak: Medical, Anthropological, and Public Health Perspectives. 2019. p. 121-32.
28. Giannini S, Albrechtsen AB. COVID-19 school closures around the world will hit girls hardest UNESCO; 2020 [
29. Ethical and safety recommendations for intervention research on violence against women. Building on lessons from the WHO publication *Putting women first: ethical and safety recommendations for research on domestic violence against women*. Geneva: World Health Organization; 2016.
30. The Data Protection Act, 24 (2019).
31. McHugh ML. The chi-square test of independence. *Biochem Med (Zagreb)*. 2013;23(2):143-9.
32. Kenya. Ministry of H, Kenya National Bureau of S, National ACC, Kenya Medical Research I, National Council for P, Development, et al. Kenya demographic and health survey, 20142015.
33. Services MoLaSPoKDoCs. Violence against Children in Kenya: Findings from a National Survey, 2019. Kenya; 2019.
34. Clayton MB, Mace B. Male Victims of Sexual Assault: Phenomenology, Psychology, Physiology. *J Am Acad Psychiatry Law*. 2011;39(2):197-205.
35. Hlavka HR. Speaking of Stigma and the Silence of Shame: Young Men and Sexual Victimization. *Men and Masculinities*. 2017;20(4):482-505.
36. Edinburgh L, Pape-Blabolil J, Harpin SB, Saewyc E. Multiple perpetrator rape among girls evaluated at a hospital-based Child Advocacy Center: Seven years of reviewed cases. *Child Abuse Negl*. 2014;38(9):1540-51.

1  
2  
3  
4  
5  
6  
7  
8  
9  
10  
11  
12  
13  
14  
15  
16  
17  
18  
19  
20  
21  
22  
23  
24  
25  
26  
27  
28  
29  
30  
31  
32  
33  
34  
35  
36  
37  
38  
39  
40  
41  
42  
43  
44  
45  
46  
47  
48  
49  
50  
51  
52  
53  
54  
55  
56  
57  
58  
59  
60

37. Chelangat N, Kipyego E, Kimani S, Aseka L, Munyao M, Amimo S. Trapped within a lockdown: understanding sexual and gender-based violence during the Covid-19 period. . Nairobi: Professional Criminologists Association of Kenya; 2020.

For peer review only

# BMJ Open

## Patterns of Sexual Violence Against Adults and Children during the COVID-19 Pandemic in Kenya

|                                 |                                                                                                                                                                                                                                                                                                                                                                                                                                                                                                                                                                                                                                                                         |
|---------------------------------|-------------------------------------------------------------------------------------------------------------------------------------------------------------------------------------------------------------------------------------------------------------------------------------------------------------------------------------------------------------------------------------------------------------------------------------------------------------------------------------------------------------------------------------------------------------------------------------------------------------------------------------------------------------------------|
| Journal:                        | <i>BMJ Open</i>                                                                                                                                                                                                                                                                                                                                                                                                                                                                                                                                                                                                                                                         |
| Manuscript ID                   | bmjopen-2021-048636.R1                                                                                                                                                                                                                                                                                                                                                                                                                                                                                                                                                                                                                                                  |
| Article Type:                   | Original research                                                                                                                                                                                                                                                                                                                                                                                                                                                                                                                                                                                                                                                       |
| Date Submitted by the Author:   | 27-Jul-2021                                                                                                                                                                                                                                                                                                                                                                                                                                                                                                                                                                                                                                                             |
| Complete List of Authors:       | Rockowitz, Sarah; University of Birmingham, School of Psychology<br>Stevens, Laura M.; University of Birmingham, School of Psychology<br>Rockey, James; University of Birmingham, Birmingham Business School<br>Smith, Lisa; University of Leicester, Criminology<br>Ritchie, Jessica; University of Leicester<br>Colloff, Melissa; University of Birmingham, School of Psychology<br>Kanja, Wangu; Wangu Kanja Foundation<br>Cotton, Jessica; University of Birmingham, School of Psychology<br>Njoroge, Dorothy; United States International University<br>Kamau, Catherine; Wangu Kanja Foundation<br>Flowe, Heather; University of Birmingham, School of Psychology |
| <b>Primary Subject Heading</b>: | Public health                                                                                                                                                                                                                                                                                                                                                                                                                                                                                                                                                                                                                                                           |
| Secondary Subject Heading:      | Global health                                                                                                                                                                                                                                                                                                                                                                                                                                                                                                                                                                                                                                                           |
| Keywords:                       | COVID-19, PUBLIC HEALTH, Child protection < PAEDIATRICS                                                                                                                                                                                                                                                                                                                                                                                                                                                                                                                                                                                                                 |
|                                 |                                                                                                                                                                                                                                                                                                                                                                                                                                                                                                                                                                                                                                                                         |

SCHOLARONE™  
Manuscripts



I, the Submitting Author has the right to grant and does grant on behalf of all authors of the Work (as defined in the below author licence), an exclusive licence and/or a non-exclusive licence for contributions from authors who are: i) UK Crown employees; ii) where BMJ has agreed a CC-BY licence shall apply, and/or iii) in accordance with the terms applicable for US Federal Government officers or employees acting as part of their official duties; on a worldwide, perpetual, irrevocable, royalty-free basis to BMJ Publishing Group Ltd ("BMJ") its licensees and where the relevant Journal is co-owned by BMJ to the co-owners of the Journal, to publish the Work in this journal and any other BMJ products and to exploit all rights, as set out in our [licence](#).

The Submitting Author accepts and understands that any supply made under these terms is made by BMJ to the Submitting Author unless you are acting as an employee on behalf of your employer or a postgraduate student of an affiliated institution which is paying any applicable article publishing charge ("APC") for Open Access articles. Where the Submitting Author wishes to make the Work available on an Open Access basis (and intends to pay the relevant APC), the terms of reuse of such Open Access shall be governed by a Creative Commons licence – details of these licences and which [Creative Commons](#) licence will apply to this Work are set out in our licence referred to above.

Other than as permitted in any relevant BMJ Author's Self Archiving Policies, I confirm this Work has not been accepted for publication elsewhere, is not being considered for publication elsewhere and does not duplicate material already published. I confirm all authors consent to publication of this Work and authorise the granting of this licence.

1  
2  
3  
4  
5  
6  
7  
8  
9  
10  
11  
12  
13  
14  
15  
16  
17  
18  
19  
20  
21  
22  
23  
24  
25  
26  
27  
28  
29  
30  
31  
32  
33  
34  
35  
36  
37  
38  
39  
40  
41  
42  
43  
44  
45  
46  
47  
48  
49  
50  
51  
52  
53  
54  
55  
56  
57  
58  
59  
60

Patterns of Sexual Violence Against Adults and Children  
during the COVID-19 Pandemic in Kenya

Sarah Rockowitz<sup>1</sup>, Laura M. Stevens<sup>1</sup>, James C. Rockey<sup>1</sup>, Lisa L. Smith<sup>2</sup>, Jessica Richie<sup>2</sup>,  
Melissa F. Colloff<sup>1</sup>, Wangu Kanja<sup>3</sup>, Jessica Cotton<sup>1</sup>, Dorothy Njoroge<sup>4</sup>,  
Catherine Kamau<sup>3</sup>, and Heather D. Flowe<sup>1</sup>

University of Birmingham, School of Psychology, Birmingham, UK<sup>1</sup>

University of Leicester, School of Criminology, Leicester, UK<sup>2</sup>

The Wangu Kanja Foundation, Nairobi, Kenya<sup>3</sup>

United States International University, Nairobi, Kenya<sup>4</sup>

Keywords: Gender-based violence, sexual abuse of child, rape, Kenya, exposure to violence

Word count: 4,137

Corresponding author:  
Heather D. Flowe  
School of Psychology, University of Birmingham  
52 Pritchatts Road, Birmingham, UK B15 2SA  
h.flowe@bham.ac.uk

## ABSTRACT

**Objectives** This study examined patterns of sexual violence against adults and children in Kenya during the COVID-19 pandemic to inform sexual violence prevention, protection and response efforts.

**Design** A prospective cross-sectional research design was used with data collected from March-August 2020.

**Setting** Kenya

**Participants** 317 adults, 224 children

**Main Measures** Perpetrator and survivor demographic data, characteristics of the assault.

**Results** Bivariate analyses found that children were more likely than adults to be attacked during the daytime (59% vs. 44%,  $p < .001$ ), by a single perpetrator rather than multiple perpetrators (13% vs. 31%,  $p < .001$ ), in a private as opposed to a public location (66% vs. 45%,  $p < .001$ ) and by someone known to the child (76% vs. 58%,  $p < .001$ ). Children were violated most often by neighbours (29%) and family members (20%), whereas adults were equally likely to be attacked by strangers (41%) and persons known to them (59%). These variables were entered as predictors into a logistic regression model that significantly predicted the age group of the survivor,  $\chi^2(5, N = 541) = 53.3, p = < .001$ .

**Conclusions** Patterns of sexual violence against adult and child survivors during the COVID-19 pandemic are different, suggesting age-related measures are needed in national emergency plans to adequately address sexual violence during the pandemic and for future humanitarian crises.

### Strengths and limitations of this study

This study was conducted in partnership with frontline, Human Rights Defenders, Survivor-led organizations/Networks, Social Justice Centers using a prospective study design, which enabled the systematic and rapid study of sexual violence in Kenya during the pandemic, even though there were considerable physical distancing measures in place.

The data provide detailed information about survivors and perpetrators, including where and when incidents occurred, which enabled us to compare patterns of sexual violence in adults and children.

1  
2  
3  
4  
5 The sample was comprised of individuals who were seeking help in accessing vital services;  
6 therefore, inferences about patterns nationally in Kenya cannot be made because the data may  
7  
8 not be representative.  
9  
10  
11  
12  
13

14 Information about whether patterns of sexual violence are changing during the pandemic remains  
15 unknown because sexual violence is underreported and also more difficult to report and  
16 document during emergencies/humanitarian situations/pandemics, and there is a need for real  
17 time data collection systems that gather and analyse detailed, longitudinal information about  
18 sexual violence especially in developing countries like Kenya, where service and response  
19 infrastructure are not as robust.  
20  
21  
22  
23  
24  
25  
26  
27  
28  
29  
30  
31  
32  
33  
34  
35  
36  
37  
38  
39  
40  
41  
42  
43  
44  
45  
46  
47  
48  
49  
50  
51  
52  
53  
54  
55  
56  
57  
58  
59  
60



## Patterns of Sexual Violence Against Adults and Children During the COVID-19 Pandemic in Kenya

This study focuses on Kenya, a country that has a long history of SGBV, which is exacerbated during times of national crisis, such as during election periods.<sup>1</sup> Whilst SGBV affects women, men and children, it disproportionately affects women and girls, with one in three women having faced SGBV in their lifetimes worldwide.<sup>2</sup> Previous conflicts and disasters have led to increased gender inequality, gender-based violence, and other human rights violations, owing to disruptions in response (medical), protection, and legal services.<sup>3</sup> The arrival of COVID-19 in Kenya in early March 2020 marked the start of another national crisis, with more than 56,000 confirmed cases as of November 2020.<sup>3-5</sup> In late March, President Kenyatta issued a nation-wide curfew, with all non-essential travel banned between 7pm to 5am. Schools and non-essential businesses had to close, and travel in and out of the country was heavily restricted.<sup>4, 5</sup> These measures have been extended and modified multiple times, and by November 2020, the number of people who could gather in groups was still limited. Schools were also still closed, but universities opened, and air travel restrictions were lifted.<sup>6</sup> While the measures have undoubtedly curbed the spread of the disease, they seemed to be compromising the safety and well-being of citizens. In particular, there have been widespread reports of increases in domestic and sexual violence during the COVID-19 crisis.<sup>5, 6</sup>

Around the world, humanitarian crises, such as natural disasters, conflict, and disease outbreaks, are associated with changing patterns of sexual violence.<sup>7-9</sup> After the 2010 earthquake in Haiti, for example, the odds of an adolescent girl in Haiti being sexually abused increased by 41%.<sup>9</sup> Increased sexual violence occurs during conflicts, notably in Rwanda, Kosovo, and the Democratic Republic of the Congo (DRC). These crimes are especially prevalent against women and children, and attacks by multiple perpetrators are common. In the DRC, for example, nearly

1  
2  
3 76% of women surveyed had experiences of rape that were consistent with the attack being used  
4 as a weapon of war, and 69% of women reported experiencing gang rape, with these incidents  
5 typically being perpetuated by three perpetrators on average.<sup>10</sup> These findings are consistent with  
6 research conducted in the Central African Republic, Libya, and Mali, which found that multiple-  
7 perpetrator rape was commonly reported by survivors.<sup>11</sup>  
8  
9

10 SGBV increases during disease outbreaks, with studies reporting increases in Sierra  
11 Leone, Liberia, and Guinea during the Ebola outbreaks in West Africa in 2014-2016, and  
12 especially high increases in teenage pregnancies were reported in Sierra Leone.<sup>12, 13</sup> Similarly,  
13 Zika and cholera outbreaks have been linked with increased incidence of domestic violence, and  
14 reductions in funding for and access to public health services.<sup>14</sup> Physical distancing measures  
15 implemented during pandemics are also thought to be responsible for changing patterns and  
16 increases in violence. For instance, lockdowns and curfews mean that people must remain  
17 indoors with abusers and are unable to access outside assistance because police and vital services  
18 are unavailable, and abusers can act with impunity.<sup>15, 16</sup>  
19  
20  
21  
22  
23  
24  
25  
26  
27  
28  
29  
30  
31  
32  
33  
34

35 More research on SGBV during times of compounding crises is needed, however. SGBV  
36 is highly stigmatized, which leads to underreporting, especially in developing countries that have  
37 high levels of gender inequality. Further, it is difficult to assess whether patterns and rates of  
38 SGBV are changing during times of crisis, owing to the unavailability of nationally  
39 representative data and a lack of up-to-date and recurring data collection and a lack of data  
40 harmonization which would allow for examining SGBV trends in relation to humanitarian crises,  
41 and inform effective prevention, protection, and responses.  
42  
43  
44  
45  
46  
47  
48  
49  
50

51 During the ongoing COVID-19 outbreak, several months of lockdown measures,  
52 economic challenges, health concerns, and changing global relations have increased concerns of  
53  
54  
55  
56  
57  
58  
59  
60

1  
2  
3 a heightened risk of SGBV. This violence during lockdown is being considered a shadow  
4  
5 pandemic with the UN Population Fund estimating an additional 31 million cases of SGBV  
6  
7 worldwide following 6-months isolation.<sup>16, 17</sup> Governments in some countries have had to create  
8  
9 or supply alternate housing for people fleeing abusive situations, as was the case in Italy and  
10  
11 France, with hotels being used as safe houses.<sup>16</sup> Social isolation policies have distinct impacts on  
12  
13 children as well. Adolescent girls' absence from school, coupled with the lack of alternative safe  
14  
15 spaces or shelters, has been associated with increased vulnerability to sexual violence from  
16  
17 family members and others, including guardians, neighbours and community members.<sup>18</sup> As seen  
18  
19 during the Ebola crisis, the closure of schools was associated with increased sexual violence  
20  
21 against girls and boys, child pregnancies, and child marriage.<sup>19</sup>  
22  
23  
24  
25

26 This study prospectively investigated patterns of sexual violence perpetrated against  
27  
28 adults and children in Kenya during the COVID-19 pandemic. We analysed data from interviews  
29  
30 with adult survivors and the guardians of child survivors conducted by human rights defenders  
31  
32 and members of the social justice centers during the pandemic. We focus on sexual violence  
33  
34 because it has received less attention during the pandemic compared to physical violence.  
35  
36 Further, research to date has not compared patterns of violence for adults and children. Doing so  
37  
38 is critical because social isolation measures may differentially affect people in relation to age,  
39  
40 and different measures may need to be put in place depending on the age group to prevent and  
41  
42 respond to SGBV during COVID-19.  
43  
44  
45  
46

47 Based on the literature reviewed above, we predicted that there would be a greater  
48  
49 number of women and girls violated compared to men and boys. Additionally, we anticipated  
50  
51 there would be age-related differences in the types of locations in which sexual violence is  
52  
53 occurring. Owing to school closures, and a lack of alternative safe spaces, we predicted that  
54  
55  
56  
57  
58  
59  
60

1  
2  
3 children would be at a greater risk than adults during the day, and in private compared to public  
4 locations. We also compared the incidence of multiple versus single perpetrator attacks to better  
5 understand the nature of the violence occurring in relation to age. To our knowledge, no previous  
6 research has compared adults and children regarding the prevalence of violations committed by  
7 multiple perpetrators in Kenya. Hence, no age group predictions were made concerning multiple  
8 perpetrators.  
9

## 16 **METHOD**

### 19 **Design**

20 A quantitative between-group prospective research design was used. The criterion  
21 variable was age group (child or adult survivor). The predictor variables included the offense  
22 characteristics displayed in Table 1, which also summarises how the variables were  
23 operationalized.  
24  
25  
26  
27  
28  
29  
30  
31  
32  
33  
34  
35  
36  
37  
38  
39  
40  
41  
42  
43  
44  
45  
46  
47  
48  
49  
50  
51  
52  
53  
54  
55  
56  
57  
58  
59  
60

**Table 1***Descriptions of how predictor variables were coded and operationalised*

| Variable                      | Definition                                                                                                                                                                                                                                                                                                                                                                                                                                                                                                                                                                                                                                        |
|-------------------------------|---------------------------------------------------------------------------------------------------------------------------------------------------------------------------------------------------------------------------------------------------------------------------------------------------------------------------------------------------------------------------------------------------------------------------------------------------------------------------------------------------------------------------------------------------------------------------------------------------------------------------------------------------|
| Female Survivor               | Whether the survivor was female (coded as 1) as opposed to male (coded as 0)                                                                                                                                                                                                                                                                                                                                                                                                                                                                                                                                                                      |
| Male Perpetrator              | Whether the perpetrator was male (coded as 1) as opposed to female (coded as 0)                                                                                                                                                                                                                                                                                                                                                                                                                                                                                                                                                                   |
| Daytime Attack                | Whether the attack occurred in the daytime (6:00am-5:59pm; coded as 1) as opposed to at night (6:00pm-5:59am; coded as 0)                                                                                                                                                                                                                                                                                                                                                                                                                                                                                                                         |
| Private or Public Location    | Whether the attack occurred in a private home (coded as 1) as opposed to a public location where the violation could have been witnessed or interrupted by a member of the public (coded as 0).                                                                                                                                                                                                                                                                                                                                                                                                                                                   |
| Private Location Type         | Private locations were further subdivided into victim residence (coded as 1 for victim residence, 0 for any other location public or private); perpetrator residence (coded as 1 for perpetrator residence, 0 for any other location public or private); or other residence (coded as 1 for other residence, 0 for any other location public or private).                                                                                                                                                                                                                                                                                         |
| Multiple Perpetrator          | Whether the attack was perpetrated by more than one perpetrator (coded as 1) as opposed to a singular perpetrator (coded as 0).                                                                                                                                                                                                                                                                                                                                                                                                                                                                                                                   |
| Known or Stranger Perpetrator | Whether the attack was perpetrated by someone known to the survivor (coded as 1) or a stranger (coded as 0)                                                                                                                                                                                                                                                                                                                                                                                                                                                                                                                                       |
| Perpetrator Relationship Type | Perpetrator relationship type was subdivided into neighbour (coded as 1 for neighbour, 0 for any other relationship type); stranger (coded as 1 for stranger, 0 for any other relationship type); family member (coded as 1 for family member, 0 for any other relationship type); acquaintance/friend (coded as 1 for acquaintance/friend, 0 for any other relationship type); spouse/husband/boyfriend (coded as 1 for spouse/husband/boyfriend, 0 for any other relationship type); authority figure (coded as 1 for authority figure, 0 for any other relationship type); or other (coded as 1 for other, 0 for any other relationship type). |

## Participants

Participants ( $N=787$ ) were survivors of sexual violence. All were residents of Kenya, living in 23 counties, and had contacted human rights defenders for assistance in obtaining vital services in the aftermath of sexual violence during the COVID-19 pandemic between March and August 2020. The human rights defenders interviewed the survivors (or their legal guardians if they were under 18) about the offense upon intake. The interview protocol was informed by World Health Organization's (WHO) ethical principles for research on SGBV and safety protocols developed by the human rights defenders for conducting their work with survivors. The survivors were aged between 7 months and 72 years ( $M = 21.3$ ;  $SD = 9.4$ ).

Survivors were categorized into two age groups. Following definitions provided by WHO, the child group included survivors aged 17 years and younger, whereas the adult group included survivors aged 18 years and older.<sup>1</sup>

After excluding cases with missing data on the predictor variables, the final sample consisted of 224 survivors in the child group and 317 in the adult group. The participants in the final sample for the child group ranged in age from 8 months to 17 years ( $M = 12.6$ ,  $SD = 3.9$ ), 83% were girls, and 93% were perpetrated against by men, and for the adult group, ranged in age from 18 to 72 ( $M = 27.1$ ,  $SD = 8.1$ ) years, 92% were women, and 96% were perpetrated against by men.

## Materials

The data were obtained from records held by the human rights defenders who were assisting survivors in accessing vital services during the pandemic. They interviewed survivors about the incident and recorded information about the case on their standard intake form. They recorded the date, time, and location of the incident, and gave a free text description summarising

1  
2  
3 the incident. The form also had specific items to document the number of perpetrators, the  
4 relationship between the survivor and perpetrator(s), the location of the attack, and the age and  
5 gender of the survivor and perpetrator. Additionally, whilst not analysed in the current paper, any  
6 services (e.g., police, medical, safe house) the survivor had accessed were also recorded.  
7  
8  
9

## 10 11 12 **Procedure**

13  
14 Each intake form was read by two members of the research team to create the dataset. They  
15 coded the data using the criteria outlined in Table 1. If there was missing data on the form, the  
16 team read the incident summary and attempted to complete the missing information.  
17  
18  
19

## 20 21 22 **Ethics**

23  
24 The confidentiality of the data was maintained by the research team, and safety precautions  
25 were taken to minimize any risks that might cause physical harm to participants of this study. Data  
26 collection involved qualitative interviews only, and participants were offered psychological  
27 services post-interview. The Kenyan Data Protection Act (2019) was adhered to in the conduct of  
28 this research study.<sup>20</sup> Special attention was paid to Part IV of the Act, which notes that personal  
29 data should be processed with special attention to the privacy of the data subject, data should only  
30 be collected for specified and legitimate purposes, and that the data subject has a right to know  
31 how their data is used.<sup>20</sup> The data belong to the Wangu Kanja Foundation and the Sexual Violence  
32 Survivors' Network in Kenya, and permission to use the data was obtained from these  
33 organisations to conduct the analyses. The research was also approved by the Science, Technology,  
34 Engineering, and Mathematics Ethics Committee at the University of Birmingham.  
35  
36  
37  
38  
39  
40  
41  
42  
43  
44  
45  
46  
47  
48

## 49 50 **Patient and Public Involvement**

51 We relied heavily on input from civil society grassroots organisations who work on the  
52 frontlines to assist survivors in accessing vital services in the aftermath of sexual violence,  
53  
54  
55  
56  
57  
58  
59

1  
2  
3 including the Wangu Kanja Foundation and the Sexual Violence Survivors' Network in Kenya.  
4  
5 These organisations co-developed the research questions, the study design including the data  
6  
7 collection instruments. They also conducted participant recruitment, data collection, and assisted  
8  
9 with manuscript preparation. Their experience and knowledge with sexual violence in Kenya  
10  
11 informed every aspect of the project. Their reputation within the Kenyan communities enabled  
12  
13 survivors to disclose the incidents that occurred. The Wangu Kanja Foundation and human rights  
14  
15 defenders would also be integral in disseminating the research findings to their networks and  
16  
17 relevant stakeholders.  
18  
19  
20

### 21 **Statistical analysis**

22  
23  
24 As our main analysis, we used logistic regression with age group as the dependent variable  
25  
26 to determine which offense characteristics significantly differentiated the child and adult groups.  
27  
28 The child age group was coded as 1 in the analysis, whereas the adult age group was coded as 0.  
29  
30 While our data contain detailed information about each attack, we restrict our analysis to a limited  
31  
32 number of binary variables in Table 1 as predictors. This is because there is a risk of a statistical  
33  
34 common-support problem if we use a finer grained analysis. For example, whilst we have detailed  
35  
36 data on where survivors were attacked, or their relationship with the perpetrator, we could not  
37  
38 exploit this as few in the child group were attacked going to work, or by their spouse or partner. To  
39  
40 avoid this difficulty, we used the coarser coding of relationship, known versus stranger perpetrator,  
41  
42 and whether the attack took place in a public place or in private. This ensured that there were  
43  
44 sufficient numbers of both children and adults in all categories. We then supplemented this analysis  
45  
46 by tabulating the finer coding in Tables 2 and 3 .  
47  
48  
49  
50  
51  
52  
53  
54  
55  
56  
57  
58  
59  
60



**Table 2***Distribution of Perpetrator Relationship to Survivor within Age Group*

|                          | Child<br><i>n</i> =224 | Adult<br><i>n</i> =317 |
|--------------------------|------------------------|------------------------|
| Neighbour                | 29%                    | 6%                     |
| Stranger                 | 25%                    | 41%                    |
| Family member            | 20%                    | 5%                     |
| Other                    | 12%                    | 16%                    |
| Acquaintance/friend      | 11%                    | 12%                    |
| Spouse/husband/boyfriend | 3%                     | 15%                    |
| Authority figure         | 2%                     | 6%                     |

**Table 3***Distribution of Attack Location within Age Group*

|                              | Child<br><i>n</i> =224 | Adult<br><i>n</i> =317 |
|------------------------------|------------------------|------------------------|
| Perpetrator's house          | 41%                    | 20%                    |
| Public                       | 28%                    | 48%                    |
| Survivor's house             | 23%                    | 23%                    |
| Other house                  | 7%                     | 6%                     |
| Survivor/perpetrator's house | 1%                     | 3%                     |

We conducted preliminary analyses to identify which variables to enter into the model using Pearson's chi square tests for association. This allowed for testing whether the association between age group and each of the dichotomous variables was statistically significant. Only the variables that were significantly associated with age group were entered into the logistic regression model. To control for Type 1 errors, Bonferroni corrections were applied to the .05 alpha level (adjusted alpha = .008, with 6 variables). The strength of the relationship between the individual offense characteristics was assessed using Cramer's V, which measures the magnitude of the relationship between two categorical variables.<sup>21</sup> Values that fall between .41 and .60 were

1  
2  
3 interpreted as large, whereas values that fall between .20 and .40 were interpreted as moderate in  
4  
5 magnitude. Values smaller than .20 were regarded as associations small in magnitude. All analyses  
6  
7 were conducted using SPSS version 26.  
8  
9

10 Our data are freely available at: <https://osf.io/b9dzp/>.

## 11 12 13 RESULTS

14  
15 Bivariate (chi square) analysis indicates that children compared to adults were less likely  
16  
17 to be female and less likely to be attacked by multiple perpetrators (Table 4). Children were also  
18  
19 more likely to be attacked in a private location, by a known perpetrator and were more likely to be  
20  
21 attacked in the daytime. The associations between age and private location, and age and multiple  
22  
23 perpetrators was moderately large, whereas the strength of the other associations, while  
24  
25 statistically significant, was small in magnitude.  
26  
27

28  
29 **Table 4**

30 *Comparisons between characteristics of sexual violence against children vs. adults: bivariate*  
31 *analysis*

| 32<br>33<br>34<br>35 Variable              | Child<br>n=224 | Adult<br>n=317 | Pearson's $\chi^2$ | p     | Cramer's<br>V |
|--------------------------------------------|----------------|----------------|--------------------|-------|---------------|
| 36 Female victim                           | 83%            | 92%            | 11.41              | 0.001 | 0.145         |
| 37 Male Perpetrator                        | 92%            | 94%            | 1.17               | 0.279 | 0.047         |
| 38 Daytime Attack                          | 59%            | 44%            | 13.18              | <.001 | 0.156         |
| 40 Private versus Public Location          | 66%            | 45%            | 21.55              | <.001 | 0.2           |
| 42 Multiple Perpetrators                   | 13%            | 31%            | 24.2               | <.001 | 0.212         |
| 44 Known versus Stranger<br>45 Perpetrator | 76%            | 58%            | 17.86              | <.001 | 0.182         |

46  
47  
48  
49  
50 In the logistic regression model, the variables that were statistically significant from the  
51  
52 bivariate analysis (chi square results) were entered as predictors (i.e., female survivor, daytime  
53  
54 attack, private versus public location, multiple perpetrators, and known versus stranger  
55  
56  
57  
58  
59  
60

perpetrator), and the dependent variable was age group. The results are shown in Table 5. The overall model was statistically significant,  $\chi^2(5, N = 541) = 53.3, p < .001$ . According to Nagelkerke's  $R^2$ , 13% of the variability in age group was accounted for by the predictors in the model. Child compared to adult survivors were 1.61 times more likely to be attacked during the day, and 1.72 times more likely to be attacked in private as opposed to in public. Child compared to adult survivors were also significantly less likely ( $OR=.458$ ) to be female, and less likely ( $OR=.528$ ) to be attacked by multiple perpetrators.

**Table 5**  
*Outputs of logistic regression by predictor variable*

|                                   | df | Estimate | SE   | Wald $\chi^2$ | <i>p</i> |
|-----------------------------------|----|----------|------|---------------|----------|
| Female victim                     | 1  | -0.782   | 0.29 | 7.3           | 0.007    |
| Daytime Attack                    | 1  | 0.474    | 0.19 | 6.5           | 0.011    |
| Private versus Public Location    | 1  | 0.543    | 0.21 | 6.96          | 0.008    |
| Multiple Perpetrators             | 1  | -0.638   | 0.27 | 5.77          | 0.016    |
| Known versus Stranger Perpetrator | 1  | 0.295    | 0.34 | 1.6           | 0.21     |

Tables 2 and 3 present a more detailed descriptive analysis of the child and adult cases on the relationship between the perpetrator and the victim, and the locations in which the attacks took place. As can be seen, age group was significantly associated with the relationship between the perpetrator and the survivor,  $\chi^2(7, N = 541) = 107.84, p < .001$ . Children were most often victimized by neighbours, followed by strangers and family members, whereas adults were most often victimized by strangers followed by other types of perpetrators (customer, community member, friend of a friend) and spouses. Age group was also significantly associated with attack location,  $\chi^2(4, N = 541) = 35.59, p < .001$ . Children were most often attacked at the perpetrator's house (41% of the cases), whereas adults were most often attacked in public locations (48% of cases).

## DISCUSSION

### Summary of Key Findings

We compared patterns of sexual violence committed against adults and children in Kenya during the COVID-19 pandemic. The data arose from interviews conducted by human rights defenders with survivors and describes the experiences of 541 survivors. We found that the children in our sample were on average four years younger compared to national surveys of children in Kenya.<sup>22, 23</sup> Further, compared to adults, children were more likely to be attacked during the day, in private as opposed to public locations, by lone perpetrators, and by neighbours. In what follows, we discuss our findings in relation to existing research and draw implications for policy.

### Comparisons to Current Literature

There were significant numbers of children in our sample, which is unsurprising, as approximately half of GBV survivors are children during humanitarian crises. However, the children in our sample were 12 years old on average, which is 4 years younger than the nationally representative samples taken pre-pandemic.<sup>22, 23</sup> Our sample was not nationally representative due to time and resource constraints, and it must also be noted that this violence was occurring within a particular crisis and the consequences of other crises may be different. However, it is still notable that the child survivors in our sample were younger than previous national samples have indicated. A recent study in Kenya noted that survivors who are being seen in medical settings during the pandemic appear to be younger compared to before the pandemic, speculating this is due to school closures during the pandemic.<sup>24</sup> Although SGBV, such as domestic violence, has been linked to cases of domestic homicide in Kenya, there were no mortalities in our study sample.<sup>25</sup>

1  
2  
3 We also found that children were 1.61 times more likely than adults to be attacked during  
4 the day. This could be attributed to the way that children and adults were spending their time  
5 during the pandemic. Because schools were closed, and there was no provision of any alternative  
6 safe spaces, children may have been often left alone or under the care or supervision of  
7 neighbours or community members, which may have made them more vulnerable to attack in  
8 some instances. Children were more likely to be attacked in private as compared to public  
9 locations. Adults in our sample were about equally likely to be attacked during the day as at  
10 night. Further, in keeping with previous research, significantly more adults were violated by  
11 multiple perpetrators in one attack compared to children.<sup>26</sup>  
12  
13  
14  
15  
16  
17  
18  
19  
20  
21  
22  
23

24 The proportion of boys in the child group was larger than the proportion of men in the  
25 adult group. This may reflect differential rates of victimization for men compared to boys, as  
26 boys are more vulnerable to assault than men due to their age. Another possible reason is that  
27 sexual violence against men compared to boys is disclosed less often. The legal definition of rape  
28 in Kenya, like many countries, requires ‘vaginal penetration’, which reinforces sociocultural  
29 notions that men cannot be sexually victimised.<sup>27</sup> Further, the tendency for people to believe that  
30 the victimisation of men is harmless, coupled with self-blame and fear on the part of victims that  
31 their community and family will react negatively towards them, discourage men from seeking  
32 help, and reporting sexual offenses to the police.<sup>28</sup>  
33  
34  
35  
36  
37  
38  
39  
40  
41  
42  
43

44 The children in our sample were more likely to be violated by someone they knew than a  
45 stranger. For adults, perpetrators were most likely to be strangers, followed by neighbours and  
46 community members, and spouses. The most common perpetrators for children were neighbours,  
47 followed by strangers, and family members. Adults were violated by strangers more frequently  
48 because they were often attacked when the opportunity struck, such as while walking to or from  
49  
50  
51  
52  
53  
54  
55  
56  
57  
58  
59  
60

1  
2  
3 work, whereas children were violated by neighbours when they were left under their supervision  
4 due to school closures and their parents' job requirements.<sup>29</sup> Children were attacked by  
5 neighbours and in the perpetrators' houses at higher rates than adults. Although both groups were  
6 more likely to be violated by someone they knew as opposed to a stranger, and in both groups  
7 more than half of the perpetrators were known to the survivor, there is a high proportion of  
8 stranger compared to known assailants in both age groups. There were several instances in our  
9 data set in which neighbours invited children to use a computer or access the Internet, and then  
10 assaulted them once they were inside the neighbour's residence.  
11  
12  
13  
14  
15  
16  
17  
18  
19  
20

### 21 **Strengths and Limitations**

22  
23  
24 This research was conducted in partnership with frontline, survivor-led organisations,  
25 using a prospective study design, which are key strengths. This enabled us to study sexual  
26 violence systematically and rapidly in Kenya during the pandemic, even though there were  
27 considerable physical distancing measures in place. Further, our data are unusually rich. The data  
28 provide detailed information about survivors and perpetrators, where and when the incidents  
29 occurred, which allowed for studying patterns of sexual violence. There are also several  
30 limitations of our study to note. First, the sample was comprised of individuals who were seeking  
31 help in accessing vital services. Hence, inferences about patterns nationally in Kenya cannot be  
32 made because the data may not be representative. Further, our data do not provide information  
33 about overall sexual violence trends in our study setting. Like many countries around the world,  
34 sexual violence is underreported, and detailed, longitudinal information about sexual violence  
35 incidents are lacking. Consequently, researchers struggle to make inferences about whether  
36 patterns of violence are changing during COVID-19.<sup>30</sup> For example, the Demographic and  
37 Health Survey in Kenya, which is a nationally representative survey of adults conducted every  
38  
39  
40  
41  
42  
43  
44  
45  
46  
47  
48  
49  
50  
51  
52  
53  
54  
55  
56  
57  
58  
59  
60

1  
2  
3 five years, does not gather in-depth information about violations. For example, it does not collect  
4 information about the time of day (or night) the attack occurred, if there were multiple  
5 perpetrators involved in the attack, and if the attack took place in a public or private location.  
6  
7 Similarly, the national Violence Against Children Survey in Kenya, conducted in 2010 and 2019,  
8 does not gather in depth information. We also had to rely on second-hand accounts from  
9 guardians of sexual violence against children, owing to a lack of trained personnel and adequate  
10 resources in Kenya for interviewing children. Some children were too young to be interviewed,  
11 with the youngest victim being just seven-months old. Finally, our model better accounted for  
12 patterns of violence against adults compared to children. This is because some of the factors we  
13 analysed were more applicable to adults than children (e.g., employment, romantic relationships,  
14 being alone in public).

## 25 26 27 **Recommendations and Conclusion**

28  
29 We urge policy makers to ensure that government COVID-19 emergency management  
30 and recovery planning adequately addresses SGBV and that minimising the risk of additional  
31 SGBV risk is integrated into national crisis policies. In particular, the results above suggest this  
32 should include the provision of adequate alternative safe spaces and shelters when schools are  
33 closed. Further, many communities have voluntarily-organised neighbourhood watch groups that  
34 are focused on security issues, and these should be explicitly expanded and supported to monitor  
35 and prevent SGBV. Community leaders have also said that there is a need for more social halls  
36 – community facilities for holding meetings, which would enable screening educational films,  
37 and other social activities. These structures can be a safe space for children and can be built  
38 using constituency development funds, which each Member of Parliament in Kenya receives to  
39 undertake projects that will address the urgent needs of their constituents.  
40  
41  
42  
43  
44  
45  
46  
47  
48  
49  
50  
51  
52  
53  
54  
55  
56  
57  
58  
59  
60

1  
2  
3 Our results indicate the importance of high-quality and timely data in understanding and  
4 thus combatting SGBV. We thus recommend governments invest in real-time data collection and  
5 analysis systems to capture the evolving distribution of SGBV and to allow for the study of  
6 regional trends. Data collection would allow authorities to identify crime hot spots and violations  
7 being perpetrated by serial offenders, and to monitor the accessibility of vital services to help  
8 ensure that survivors have support. This information is crucial in designing effective  
9 interventions. For example, by knowing the location and time of attacks, responsive programmes  
10 could be put in place to engage children in other activities (e.g., drama, sports, and other  
11 educational and recreation activities) when they are not in school during the day to ensure that  
12 they are not left unattended by a responsible adult. These interventions can be low cost, with  
13 communities mobilized to create such activities with the help of university students, local NGOs,  
14 neighbourhood teachers, and religious organizations. Police patrols and community initiatives  
15 could also be planned for times at which SGBV rates peak to deter attacks and apprehend  
16 offenders. Further, the installation of street lighting might deter perpetrators from attacking  
17 women and children. Another suggestion is to establish a national sexual offender register in  
18 Kenya that would warn communities about high-risk offenders. The collection of real-time data  
19 can also inform educational programs that sensitize parents and children about community risks.  
20 These efforts must be survivor-centred, involving survivors in the implementation and evaluation  
21 of the systems.

22  
23  
24  
25  
26  
27  
28  
29  
30  
31  
32  
33  
34  
35  
36  
37  
38  
39  
40  
41  
42  
43  
44  
45  
46  
47 More generally, the results in this paper highlight the latent risk of SGBV, particularly for  
48 women and girls. While its manifestation currently waxes and wanes dependent on the context,  
49 meaningful reductions in violence will require changing the narrative such that SGBV is  
50 understood to be a crime, a gross violation of human rights, and that its pre-eminent importance  
51  
52  
53  
54  
55  
56  
57  
58  
59  
60



1  
2  
3 as a determinant of physical, emotional, and mental health is reflected in national and county  
4 budgets. Funding for programming, interventions, and research should be included.  
5  
6

7  
8 High rates of SGBV also necessitate adequate protection for the needs of survivors. To  
9  
10 this end, the national government has approved the use of the National Government Affirmative  
11 Fund to facilitate the establishment of safe spaces/shelters in all 47 counties to ensure survivors'  
12 safety and security is safe guarded. However, advocacy is required to ensure the funds are  
13 directed appropriately.  
14  
15  
16  
17  
18

19 The implementation of emergency referral pathways that enable survivors to access  
20 comprehensive care and support services should be enacted by government. Curfews and other  
21 social distancing regulations need to include SGBV response mechanisms to ensure the  
22 continued availability and accessibility of services for survivors. Further, the medico-legal  
23 response to SGBV can be strengthened by expediting restraining orders and prosecutions, and by  
24 establishing 'one-stop' centres to allow survivors to access essential services, and authorities to  
25 collect evidence, all in one location. This would also facilitate the preservation of evidence and  
26 protection of survivors to facilitate access to justice.  
27  
28  
29  
30  
31  
32  
33  
34  
35  
36  
37  
38  
39  
40  
41  
42  
43  
44  
45  
46  
47  
48  
49  
50  
51  
52  
53  
54  
55  
56  
57  
58  
59  
60

## Declarations

### Authors' Contributions

HF and WK conceptualized and designed the data collection methods utilized in this project. SR and LMS drafted the protocol which was then reviewed by HF, MC, JCR, and LMS. HF, SR and LMS analysed the data. HF, SR, LMS, JCR, MC, LLS, JR, WK, JC, DN, and CK contributed to and reviewed the draft version of the manuscript and approved the final version.

### Non-author Contributors

The data were made possible by the efforts of the Survivors of Sexual Violence in Kenya and the Community Justice Centre who collected the information we analysed as part of their work in caring for survivors.

### Competing interests

The authors declare that they have no competing interests.

### Funding

This research was funded by ESRC Grant ES/T010207/1 (to H.D.F., M.F.C., J.C.R. and the Wangu Kanja Foundation) and AHRC Grant AH/T008091/1 (to H.D.F. and the Wangu Kanja Foundation), the Institute for Global Innovation, University of Birmingham (to H.D.F. and W.K.F.), and a research grant from the Ring for Peace Foundation (to L.S.).

### Ethics

This research was approved by the University of Birmingham Science, Technology, Engineering, and Mathematics Ethics Committee (ERN\_19-0183).

### Availability of data and materials

All data generated during this study will be included in the published scoping review and will also be made available upon request.

## Acknowledgements

1  
2  
3  
4  
5  
6  
7  
8  
9  
10  
11  
12  
13  
14  
15  
16  
17  
18  
19  
20  
21  
22  
23  
24  
25  
26  
27  
28  
29  
30  
31  
32  
33  
34  
35  
36  
37  
38  
39  
40  
41  
42  
43  
44  
45  
46  
47  
48  
49  
50  
51  
52  
53  
54  
55  
56  
57  
58  
59  
60

We are grateful to the many, necessarily anonymous, human rights defenders who continue to work with survivors in difficult and dangerous conditions in Kenya.

For peer review only

## References

1. Odhiambo A. "They Were Men in Uniform" Sexual Violence Against Women and Girls in Kenya's 2017 Elections USA: Human Rights Watch 2017.
2. WHO. Violence against women who.int: World Health Organization; 2021 [
3. Health Mo. First Case of Coronavirus Disease Confirmed in Kenya health.go.ke: Ministry of Health; 2020 [
4. Ritchie H, Ortiz-Ospina E, Beltekian D, Mathieu E, Hasell J, Macdonald B, et al. Kenya: Coronavirus Pandemic Country Profile ourworldindata.org: ourworldindata.org; 2020 [
5. Flowe H, Rockowitz S, Rockey J, Kanja W. Sexual and Other Forms of Violence During the COVID-19 Pandemic Emergency in Kenya. The University of Birmingham 2020.
6. Bearak M, Ombuor R. Kenya's coronavirus curfew begins with wave of police crackdowns. The Washington post. 2020.
7. Marsh M, Purdin S, Navani S. Addressing sexual violence in humanitarian emergencies. *Glob Public Health*. 2006;1(2):133-46.
8. Dara Kay C, Ragnhild N. Sexual violence in armed conflict: Introducing the SVAC dataset, 1989–2009. *Journal of peace research*. 2014;51(3):418-28.
9. Sloan E, Killion C, Yarandi H, Sharps P, Lewis-O'Connor A, Hassan M, et al. Experiences of violence and abuse among internally displaced adolescent girls following a natural disaster. *J Adv Nurs*. 2017;73(12):3200-8.
10. Initiative HH, Institute OS. Characterizing Sexual Violence in the Democratic Republic of the Congo: Profiles of Violence, Community Responses, and Implications for the Protection of Women. Cambridge, MA: Harvard University 2009.
11. Guterres A. Conflict Related Sexual Violence: Report of the United Nations Secretary General. United Nations; 2019.
12. O'Brien M, Tolosa MX. The effect of the 2014 West Africa Ebola virus disease epidemic on multi-level violence against women. *International journal of human rights in healthcare*. 2016;9(3):151-60.
13. Schwartz DA, Anoko JN, Abramowitz SA. Pregnant in the Time of Ebola Women and Their Children in the 2013-2015 West African Epidemic [text]. Cham: Springer International Publishing : Imprint: Springer,; 2019.
14. Chandan JS, Taylor J, Bradbury - Jones C, Nirantharakumar K, Kane E, Bandyopadhyay S. COVID-19: a public health approach to manage domestic violence is needed. *The Lancet Public Health*. 2020;5(6).
15. Mittal S, Singh T. Gender-Based Violence During COVID-19 Pandemic: A Mini-Review. *Frontiers in Global Women's Health*. 2020;1(4).
16. Bradbury-Jones C, Isham L. The pandemic paradox: The consequences of COVID-19 on domestic violence. *J Clin Nurs*. 2020;29(13-14):2047-9.
17. UNFPA. Millions more cases of violence, child marriage, female genital mutilation, unintended pregnancy expected due to the COVID-19 pandemic 2020 [Available from: <https://www.unfpa.org/news/millions-more-cases-violence-child-marriage-female-genital-mutilation-unintended-pregnancies>].
18. Onyango M, Resnick K, Davis A, Shah R. Gender-Based Violence Among Adolescent Girls and Young Women: A Neglected Consequence of the West African Ebola Outbreak: Medical, Anthropological, and Public Health Perspectives. 2019. p. 121-32.

19. Giannini S, Albrechtsen AB. Covid-19 school closures around the world will hit girls hardest unesco.org: UNESCO; 2020
20. The Data Protection Act, 24 (2019).
21. McHugh ML. The chi-square test of independence. *Biochem Med (Zagreb)*. 2013;23(2):143-9.
22. Kenya. Ministry of H, Kenya National Bureau of S, National ACC, Kenya Medical Research I, National Council for P, Development, et al. Kenya demographic and health survey, 20142015.
23. Services MoLaSPoKDoCs. Violence against Children in Kenya: Findings from a National Survey, 2019. Kenya; 2019.
24. Johnson K, Green L, Volpellier M, Kidenda S, McHale T, Naimer K, Mishori R. The impact of COVID-19 on services for people affected by sexual and gender-based violence. *Int J Gynaecol Obstet*. 2020;150(3):285-287.
25. Mungai C. *Domestic Violence in Kenya: Stop Blaming Women* Cambridge, MA: Nieman Foundation; 2019.
26. Edinburgh L, Pape-Blabolil J, Harpin SB, Saewyc E. Multiple perpetrator rape among girls evaluated at a hospital-based Child Advocacy Center: Seven years of reviewed cases. *Child Abuse Negl*. 2014;38(9):1540-51.
27. Clayton MB, Mace B. Male Victims of Sexual Assault: Phenomenology, Psychology, Physiology. *J Am Acad Psychiatry Law*. 2011;39(2):197-205.
28. Hlavka HR. Speaking of Stigma and the Silence of Shame: Young Men and Sexual Victimization. *Men and Masculinities*. 2017;20(4):482-505.
29. Simba H, Ngcobo S. Are Pandemics Gender Neutral? *Women's Health and COVID-19*. *Frontiers in Global Women's Health*. 2020;1(8).
30. Chelangat N, Kipyego E, Kimani S, Aseka L, Munyao M, Amimo S. Trapped within a lockdown: understanding sexual and gender-based violence during the Covid-19 period. Nairobi: Professional Criminologists Association of Kenya; 2020.

# BMJ Open

## Patterns of Sexual Violence Against Adults and Children during the COVID-19 Pandemic in Kenya: A Prospective Cross-Sectional Study

|                                 |                                                                                                                                                                                                                                                                                                                                                                                                                                                                                                                                                                                                                                                                         |
|---------------------------------|-------------------------------------------------------------------------------------------------------------------------------------------------------------------------------------------------------------------------------------------------------------------------------------------------------------------------------------------------------------------------------------------------------------------------------------------------------------------------------------------------------------------------------------------------------------------------------------------------------------------------------------------------------------------------|
| Journal:                        | <i>BMJ Open</i>                                                                                                                                                                                                                                                                                                                                                                                                                                                                                                                                                                                                                                                         |
| Manuscript ID                   | bmjopen-2021-048636.R2                                                                                                                                                                                                                                                                                                                                                                                                                                                                                                                                                                                                                                                  |
| Article Type:                   | Original research                                                                                                                                                                                                                                                                                                                                                                                                                                                                                                                                                                                                                                                       |
| Date Submitted by the Author:   | 19-Aug-2021                                                                                                                                                                                                                                                                                                                                                                                                                                                                                                                                                                                                                                                             |
| Complete List of Authors:       | Rockowitz, Sarah; University of Birmingham, School of Psychology<br>Stevens, Laura M.; University of Birmingham, School of Psychology<br>Rockey, James; University of Birmingham, Birmingham Business School<br>Smith, Lisa; University of Leicester, Criminology<br>Ritchie, Jessica; University of Leicester<br>Colloff, Melissa; University of Birmingham, School of Psychology<br>Kanja, Wangu; Wangu Kanja Foundation<br>Cotton, Jessica; University of Birmingham, School of Psychology<br>Njoroge, Dorothy; United States International University<br>Kamau, Catherine; Wangu Kanja Foundation<br>Flowe, Heather; University of Birmingham, School of Psychology |
| <b>Primary Subject Heading</b>: | Public health                                                                                                                                                                                                                                                                                                                                                                                                                                                                                                                                                                                                                                                           |
| Secondary Subject Heading:      | Global health                                                                                                                                                                                                                                                                                                                                                                                                                                                                                                                                                                                                                                                           |
| Keywords:                       | COVID-19, PUBLIC HEALTH, Child protection < PAEDIATRICS                                                                                                                                                                                                                                                                                                                                                                                                                                                                                                                                                                                                                 |
|                                 |                                                                                                                                                                                                                                                                                                                                                                                                                                                                                                                                                                                                                                                                         |

SCHOLARONE™  
Manuscripts



I, the Submitting Author has the right to grant and does grant on behalf of all authors of the Work (as defined in the below author licence), an exclusive licence and/or a non-exclusive licence for contributions from authors who are: i) UK Crown employees; ii) where BMJ has agreed a CC-BY licence shall apply, and/or iii) in accordance with the terms applicable for US Federal Government officers or employees acting as part of their official duties; on a worldwide, perpetual, irrevocable, royalty-free basis to BMJ Publishing Group Ltd ("BMJ") its licensees and where the relevant Journal is co-owned by BMJ to the co-owners of the Journal, to publish the Work in this journal and any other BMJ products and to exploit all rights, as set out in our [licence](#).

The Submitting Author accepts and understands that any supply made under these terms is made by BMJ to the Submitting Author unless you are acting as an employee on behalf of your employer or a postgraduate student of an affiliated institution which is paying any applicable article publishing charge ("APC") for Open Access articles. Where the Submitting Author wishes to make the Work available on an Open Access basis (and intends to pay the relevant APC), the terms of reuse of such Open Access shall be governed by a Creative Commons licence – details of these licences and which [Creative Commons](#) licence will apply to this Work are set out in our licence referred to above.

Other than as permitted in any relevant BMJ Author's Self Archiving Policies, I confirm this Work has not been accepted for publication elsewhere, is not being considered for publication elsewhere and does not duplicate material already published. I confirm all authors consent to publication of this Work and authorise the granting of this licence.

1  
2  
3 1  
4 2  
5 3  
6 4  
7 4  
8 5  
9 6  
10 7  
11 8  
12 9  
13  
14  
15 10  
16  
17  
18  
19  
20  
21  
22  
23  
24  
25  
26  
27  
28  
29  
30  
31  
32  
33  
34  
35  
36  
37  
38  
39  
40  
41  
42  
43  
44  
45  
46  
47  
48  
49  
50  
51  
52  
53  
54  
55  
56  
57  
58  
59  
60

Patterns of Sexual Violence Against Adults and Children  
during the COVID-19 Pandemic in Kenya: a prospective cross-sectional study

Sarah Rockowitz<sup>1</sup>, Laura M. Stevens<sup>1</sup>, James C. Rockey<sup>1</sup>, Lisa L. Smith<sup>2</sup>, Jessica Richie<sup>2</sup>,  
Melissa F. Colloff<sup>1</sup>, Wangu Kanja<sup>3</sup>, Jessica Cotton<sup>1</sup>, Dorothy Njoroge<sup>4</sup>,  
Catherine Kamau<sup>3</sup>, and Heather D. Flowe<sup>1</sup>

University of Birmingham, School of Psychology, Birmingham, UK<sup>1</sup>

University of Leicester, School of Criminology, Leicester, UK<sup>2</sup>

The Wangu Kanja Foundation, Nairobi, Kenya<sup>3</sup>

United States International University, Nairobi, Kenya<sup>4</sup>

Keywords: Gender-based violence, sexual abuse of child, rape, Kenya, exposure to violence

Word count: 4,796

Corresponding author:  
Heather D. Flowe  
School of Psychology, University of Birmingham  
52 Pritchatts Road, Birmingham, UK B15 2SA  
h.flowe@bham.ac.uk



## ABSTRACT

**Objectives** This study examined patterns of sexual violence against adults and children in Kenya during the COVID-19 pandemic to inform sexual violence prevention, protection and response efforts.

**Design** A prospective cross-sectional research design was used with data collected from March-August 2020.

**Setting** Kenya

**Participants** 317 adults, 224 children

**Main Measures** Perpetrator and survivor demographic data, characteristics of the assault.

**Results** Bivariate analyses found that children were more likely than adults to be attacked during the daytime (59% vs. 44%,  $p < .001$ ), by a single perpetrator rather than multiple perpetrators (31% vs. 13%,  $p < .001$ ), in a private as opposed to a public location (66% vs. 45%,  $p < .001$ ) and by someone known to the child (76% vs. 58%,  $p < .001$ ). Children were violated most often by neighbours (29%) and family members (20%), whereas adults were equally likely to be attacked by strangers (41%) and persons known to them (59%). These variables were entered as predictors into a logistic regression model that significantly predicted the age group of the survivor,  $\chi^2(5, N = 541) = 53.3, p = < .001$ .

**Conclusions** Patterns of sexual violence against adult and child survivors during the COVID-19 pandemic are different, suggesting age-related measures are needed in national emergency plans to adequately address sexual violence during the pandemic and for future humanitarian crises.

### Strengths and limitations of this study

This study was conducted in partnership with frontline, Human Rights Defenders, Survivor-led organizations/Networks, Social Justice Centers using a prospective study design, which enabled the systematic and rapid study of sexual violence in Kenya during the pandemic, even though there were considerable physical distancing measures in place.

The data provide detailed information about survivors and perpetrators, including where and when incidents occurred, which enabled us to compare patterns of sexual violence in adults and children.

1  
2  
3 78  
4

5 79 The sample was comprised of individuals who were seeking help in accessing vital services;  
6  
7  
8 80 therefore, inferences about patterns nationally in Kenya cannot be made because the data may  
9  
10 81 not be representative.

11  
12 82  
13

14 83 Information about whether patterns of sexual violence are changing during the pandemic remains  
15  
16  
17 84 unknown because sexual violence is underreported and also more difficult to report and  
18  
19 85 document during emergencies/humanitarian situations/pandemics, and there is a need for real  
20  
21 86 time data collection systems that gather and analyse detailed, longitudinal information about  
22  
23  
24 87 sexual violence especially in resource-limited countries like Kenya, where service and response  
25  
26 88 infrastructure are not as robust.

27  
28 89  
29

30 90

31 91  
32  
33  
34  
35  
36  
37  
38  
39  
40  
41  
42  
43  
44  
45  
46  
47  
48  
49  
50  
51  
52  
53  
54  
55  
56  
57  
58  
59  
60

1  
2  
3 **92** **Patterns of Sexual Violence Against Adults and Children**  
4 **93** **During the COVID-19 Pandemic in Kenya**  
5 **94**

6 **95** This study focuses on Kenya, a country that has a long history of SGBV, which is exacerbated  
7  
8  
9 **96** during times of national crisis, such as during election periods.<sup>1</sup> Whilst SGBV affects women,  
10  
11 **97** men and children, it disproportionately affects women and girls, with one in three women having  
12  
13 **98** faced SGBV in their lifetimes worldwide.<sup>2</sup> Previous conflicts and disasters have led to increased  
14  
15  
16 **99** gender inequality, gender-based violence, and other human rights violations, owing to  
17  
18 **100** disruptions in response (medical), protection, and legal services.<sup>3</sup> The arrival of COVID-19 in  
19  
20  
21 **101** Kenya in early March 2020 marked the start of another national crisis, with more than 56,000  
22  
23 **102** confirmed cases as of November 2020.<sup>3-5</sup> In late March, President Kenyatta issued a nation-wide  
24  
25 **103** curfew, with all non-essential travel banned between 7pm to 5am. Schools and non-essential  
26  
27 **104** businesses had to close, and travel in and out of the country was heavily restricted.<sup>4, 5</sup> These  
28  
29  
30 **105** measures have been extended and modified multiple times, and by November 2020, the number  
31  
32 **106** of people who could gather in groups was still limited. Schools were also still closed, but  
33  
34 **107** universities opened, and air travel restrictions were lifted.<sup>6</sup> While the measures have undoubtedly  
35  
36  
37 **108** curbed the spread of the disease, they seemed to be compromising the safety and well-being of  
38  
39 **109** citizens. In particular, there have been widespread reports of increases in domestic and sexual  
40  
41 **110** violence during the COVID-19 crisis.<sup>5, 6</sup>

42  
43 **111** Around the world, humanitarian crises, such as natural disasters, conflict, and disease  
44  
45  
46 **112** outbreaks, are associated with changing patterns of sexual violence.<sup>7-9</sup> After the 2010 earthquake  
47  
48 **113** in Haiti, for example, the odds of an adolescent girl in Haiti being sexually abused increased by  
49  
50 **114** 41%.<sup>9</sup> Increased sexual violence occurs during conflicts, notably in Rwanda, Kosovo, and the  
51  
52  
53 **115** Democratic Republic of the Congo (DRC). These crimes are especially prevalent against women  
54  
55 **116** and children, and attacks by multiple perpetrators are common. In the DRC, for example, nearly

1  
2  
3 117 76% of women surveyed had experiences of rape that were consistent with the attack being used  
4  
5 118 as a weapon of war, and 69% of women reported experiencing gang rape, with these incidents  
6  
7 119 typically being perpetuated by three perpetrators on average.<sup>10</sup> These findings are consistent with  
8  
9 120 research conducted in the Central African Republic, Libya, and Mali, which found that multiple-  
10  
11 121 perpetrator rape was commonly reported by survivors.<sup>11</sup>  
12  
13

14 122 SGBV increases during disease outbreaks, with studies reporting increases in Sierra  
15  
16 123 Leone, Liberia, and Guinea during the Ebola outbreaks in West Africa in 2014-2016, and  
17  
18 124 especially high increases in teenage pregnancies were reported in Sierra Leone.<sup>12, 13</sup> Similarly,  
19  
20 125 Zika and cholera outbreaks have been linked with increased incidence of domestic violence, and  
21  
22 126 reductions in funding for and access to public health services.<sup>14</sup> Physical distancing measures  
23  
24 127 implemented during pandemics are also thought to be responsible for changing patterns and  
25  
26 128 increases in violence. For instance, lockdowns and curfews mean that people must remain  
27  
28 129 indoors with abusers and are unable to access outside assistance because police and vital services  
29  
30 130 are unavailable, and abusers can act with impunity.<sup>15, 16</sup>  
31  
32  
33  
34

35 131 More research on SGBV during times of compounding crises is needed, however. SGBV  
36  
37 132 is highly stigmatized, which leads to underreporting, especially in resource-limited countries that  
38  
39 133 have high levels of gender inequality. Further, it is difficult to assess whether patterns and rates  
40  
41 134 of SGBV are changing during times of crisis, owing to the unavailability of nationally  
42  
43 135 representative data and a lack of up-to-date and recurring data collection and a lack of data  
44  
45 136 harmonization which would allow for examining SGBV trends in relation to humanitarian crises,  
46  
47 137 and inform effective prevention, protection, and responses.  
48  
49  
50

51 138 During the ongoing COVID-19 outbreak, several months of lockdown measures,  
52  
53 139 economic challenges, health concerns, and changing global relations have increased concerns of  
54  
55  
56  
57  
58  
59  
60

1  
2  
3 140 a heightened risk of SGBV. This violence during lockdown is being considered a shadow  
4  
5 141 pandemic with the UN Population Fund estimating an additional 31 million cases of SGBV  
6  
7 142 worldwide following 6-months isolation.<sup>16, 17</sup> Governments in some countries have had to create  
8  
9  
10 143 or supply alternate housing for people fleeing abusive situations, as was the case in Italy and  
11  
12 144 France, with hotels being used as safe houses.<sup>16</sup> Social isolation policies have distinct impacts on  
13  
14 145 children as well. Adolescent girls' absence from school, coupled with the lack of alternative safe  
15  
16 146 spaces or shelters, has been associated with increased vulnerability to sexual violence from  
17  
18 147 family members and others, including guardians, neighbours and community members.<sup>18</sup> As seen  
19  
20 148 during the Ebola crisis, the closure of schools was associated with increased sexual violence  
21  
22 149 against girls and boys, child pregnancies, and child marriage.<sup>19</sup>  
23  
24  
25

26 150 This study prospectively investigated patterns of sexual violence perpetrated against  
27  
28 151 adults and children in Kenya during the COVID-19 pandemic. We analysed data from interviews  
29  
30 152 with adult survivors and the guardians of child survivors conducted by human rights defenders  
31  
32 153 and members of the social justice centers during the pandemic. We focus on sexual violence  
33  
34 154 because it has received less attention during the pandemic compared to physical violence.  
35  
36  
37 155 Further, research to date has not compared patterns of violence for adults and children. Doing so  
38  
39 156 is critical because social isolation measures may differentially affect people in relation to age,  
40  
41 157 and different measures may need to be put in place depending on the age group to prevent and  
42  
43 158 respond to SGBV during COVID-19.  
44  
45  
46

47 159 Based on the literature reviewed above, we predicted that there would be a greater  
48  
49 160 number of women and girls violated compared to men and boys. Additionally, we anticipated  
50  
51 161 there would be age-related differences in the types of locations in which sexual violence is  
52  
53 162 occurring. Owing to school closures, and a lack of alternative safe spaces, we predicted that  
54  
55  
56  
57  
58  
59  
60

1  
2  
3 163 children would be at a greater risk than adults during the day, and in private compared to public  
4  
5 164 locations. We also compared the incidence of multiple versus single perpetrator attacks to better  
6  
7  
8 165 understand the nature of the violence occurring in relation to age. To our knowledge, no previous  
9  
10 166 research has compared adults and children regarding the prevalence of violations committed by  
11  
12 167 multiple perpetrators in Kenya. Hence, no age group predictions were made concerning multiple  
13  
14  
15 168 perpetrators.

## 17 169 **METHOD**

### 19 170 **Design**

21 171 A quantitative between-group prospective research design was used. The criterion  
22  
23  
24 172 variable was age group (child or adult survivor). The predictor variables included the offense  
25  
26 173 characteristics displayed in Table 1, which also summarises how the variables were  
27  
28 174 operationalized.

30 175

32 176

34 177

36 178

38 179

40 180

181 **Table 1**  
 182 *Descriptions of how predictor variables were coded and operationalised*  
 183

| Variable                      | Definition                                                                                                                                                                                                                                                                                                                                                                                                                                                                                                                                                                                                                                        |
|-------------------------------|---------------------------------------------------------------------------------------------------------------------------------------------------------------------------------------------------------------------------------------------------------------------------------------------------------------------------------------------------------------------------------------------------------------------------------------------------------------------------------------------------------------------------------------------------------------------------------------------------------------------------------------------------|
| Female Survivor               | Whether the survivor was female (coded as 1) as opposed to male (coded as 0)                                                                                                                                                                                                                                                                                                                                                                                                                                                                                                                                                                      |
| Male Perpetrator              | Whether the perpetrator was male (coded as 1) as opposed to female (coded as 0)                                                                                                                                                                                                                                                                                                                                                                                                                                                                                                                                                                   |
| Daytime Attack                | Whether the attack occurred in the daytime (6:00am-5:59pm; coded as 1) as opposed to at night (6:00pm-5:59am; coded as 0)                                                                                                                                                                                                                                                                                                                                                                                                                                                                                                                         |
| Private or Public Location    | Whether the attack occurred in a private home (coded as 1) as opposed to a public location where the violation could have been witnessed or interrupted by a member of the public (coded as 0).                                                                                                                                                                                                                                                                                                                                                                                                                                                   |
| Private Location Type         | Private locations were further subdivided into victim residence (coded as 1 for victim residence, 0 for any other location public or private); perpetrator residence (coded as 1 for perpetrator residence, 0 for any other location public or private); or other residence (coded as 1 for other residence, 0 for any other location public or private).                                                                                                                                                                                                                                                                                         |
| Multiple Perpetrator          | Whether the attack was perpetrated by more than one perpetrator (coded as 1) as opposed to a singular perpetrator (coded as 0).                                                                                                                                                                                                                                                                                                                                                                                                                                                                                                                   |
| Known or Stranger Perpetrator | Whether the attack was perpetrated by someone known to the survivor (coded as 1) or a stranger (coded as 0)                                                                                                                                                                                                                                                                                                                                                                                                                                                                                                                                       |
| Perpetrator Relationship Type | Perpetrator relationship type was subdivided into neighbour (coded as 1 for neighbour, 0 for any other relationship type); stranger (coded as 1 for stranger, 0 for any other relationship type); family member (coded as 1 for family member, 0 for any other relationship type); acquaintance/friend (coded as 1 for acquaintance/friend, 0 for any other relationship type); spouse/husband/boyfriend (coded as 1 for spouse/husband/boyfriend, 0 for any other relationship type); authority figure (coded as 1 for authority figure, 0 for any other relationship type); or other (coded as 1 for other, 0 for any other relationship type). |

1  
2  
3 185  
4 186 **Participants**

5  
6 187 Participants ( $N=787$ ) were survivors of sexual violence. All were residents of Kenya,  
7  
8 188 living in 23 counties, and had contacted human rights defenders for assistance in obtaining vital  
9  
10 189 services in the aftermath of sexual violence during the COVID-19 pandemic between March and  
11  
12 190 August 2020. The human rights defenders interviewed the survivors (or their legal guardians if  
13  
14 191 they were under 18) about the offense upon intake. The interview protocol was informed by  
15  
16 192 World Health Organization's (WHO) ethical principles for research on SGBV and safety  
17  
18 193 protocols developed by the human rights defenders for conducting their work with survivors. The  
19  
20 194 survivors were aged between 7 months and 72 years ( $M = 21.3$ ;  $SD = 9.4$ ).

21  
22  
23 195 Survivors were categorized into two age groups. Following definitions provided by  
24  
25 196 WHO, the child group included survivors aged 17 years and younger, whereas the adult group  
26  
27 197 included survivors aged 18 years and older.<sup>1</sup>

28  
29  
30 198 After excluding cases with missing data on the predictor variables, the final sample  
31  
32 199 consisted of 224 survivors in the child group and 317 in the adult group. The participants in the  
33  
34 200 final sample for the child group ranged in age from 8 months to 17 years ( $M = 12.6$ ,  $SD = 3.9$ ),  
35  
36 201 83% were girls, and 93% were perpetrated against by men, and for the adult group, ranged in age  
37  
38 202 from 18 to 72 ( $M = 27.1$ ,  $SD = 8.1$ ) years, 92% were women, and 96% were perpetrated against  
39  
40 203 by men.

41  
42  
43 204 **Materials**

44  
45  
46 205 The data were obtained from records held by the human rights defenders who were  
47  
48 206 assisting survivors in accessing vital services during the pandemic. They interviewed survivors  
49  
50 207 about the incident and recorded information about the case on their standard intake form  
51  
52 208 (supplementary file). They recorded the date, time, and location of the incident, and gave a free  
53  
54  
55  
56  
57  
58  
59  
60



1  
2  
3 209 text description summarising the incident. The form also had specific items to document the  
4  
5 210 number of perpetrators, the relationship between the survivor and perpetrator(s), the location of  
6  
7 211 the attack, and the age and gender of the survivor and perpetrator. Additionally, whilst not analysed  
8  
9 212 in the current paper, any services (e.g., police, medical, safe house) the survivor had accessed were  
10  
11 213 also recorded.

## 14 214 **Procedure**

16  
17 215 Each intake form was read by two members of the research team to create the dataset. They  
18  
19 216 coded the data using the criteria outlined in Table 1. If there was missing data on the form, the  
20  
21 217 team read the incident summary and attempted to complete the missing information.

## 23 218 **Ethics**

24  
25 219 The confidentiality of the data was maintained by the research team, and safety precautions  
26  
27 220 were taken to minimize any risks that might cause physical harm to participants of this study. Data  
28  
29 221 collection involved qualitative interviews only, and participants were offered psychological  
30  
31 222 services post-interview. The Kenyan Data Protection Act (2019) was adhered to in the conduct of  
32  
33 223 this research study.<sup>20</sup> Special attention was paid to Part IV of the Act, which notes that personal  
34  
35 224 data should be processed with special attention to the privacy of the data subject, data should only  
36  
37 225 be collected for specified and legitimate purposes, and that the data subject has a right to know  
38  
39 226 how their data is used.<sup>20</sup> The data belong to the Wangu Kanja Foundation and the Sexual Violence  
40  
41 227 Survivors' Network in Kenya, and permission to use the data was obtained from these  
42  
43 228 organisations to conduct the analyses. The research was also approved by the Science, Technology,  
44  
45 229 Engineering, and Mathematics Ethics Committee at the University of Birmingham.

## 50 230 **Patient and Public Involvement**

1  
2  
3 231 We relied heavily on input from civil society grassroots organisations who work on the  
4  
5 232 frontlines to assist survivors in accessing vital services in the aftermath of sexual violence,  
6  
7 233 including the Wangu Kanja Foundation and the Sexual Violence Survivors' Network in Kenya.  
8  
9  
10 234 These organisations co-developed the research questions, the study design including the data  
11  
12 235 collection instruments. They also conducted participant recruitment, data collection, and assisted  
13  
14 236 with manuscript preparation. Their experience and knowledge with sexual violence in Kenya  
15  
16 237 informed every aspect of the project. Their reputation within the Kenyan communities enabled  
17  
18 238 survivors to disclose the incidents that occurred. The Wangu Kanja Foundation and human rights  
19  
20 239 defenders would also be integral in disseminating the research findings to their networks and  
21  
22 240 relevant stakeholders.  
23  
24

#### 25 26 241 **Statistical analysis**

27  
28 242 As our main analysis, we used logistic regression with age group as the dependent variable  
29  
30 243 to determine which offense characteristics significantly differentiated the child and adult groups.  
31  
32 244 The child age group was coded as 1 in the analysis, whereas the adult age group was coded as 0.  
33  
34 245 While our data contain detailed information about each attack, we restrict our analysis to a limited  
35  
36 246 number of binary variables in Table 1 as predictors. This is because there is a risk of a statistical  
37  
38 247 common-support problem if we use a finer grained analysis. For example, whilst we have detailed  
39  
40 248 data on where survivors were attacked, or their relationship with the perpetrator, we could not  
41  
42 249 exploit this as few in the child group were attacked going to work, or by their spouse or partner. To  
43  
44 250 avoid this difficulty, we used the coarser coding of relationship, known versus stranger perpetrator,  
45  
46 251 and whether the attack took place in a public place or in private. This ensured that there were  
47  
48 252 sufficient numbers of both children and adults in all categories. We then supplemented this analysis  
49  
50 253 by tabulating the finer coding in Tables 2 and 3 .  
51  
52  
53  
54  
55  
56  
57  
58  
59  
60

1  
2  
3 254  
4 255  
5 256  
6 257  
7 258  
8 259  
9 260  
10 261  
11 262

**Table 2***Distribution of Perpetrator Relationship to Survivor within Age Group*

|                          | Child<br><i>n</i> =224 | Adult<br><i>n</i> =317 |
|--------------------------|------------------------|------------------------|
| Neighbour                | 29%                    | 6%                     |
| Stranger                 | 25%                    | 41%                    |
| Family member            | 20%                    | 5%                     |
| Other                    | 12%                    | 16%                    |
| Acquaintance/friend      | 11%                    | 12%                    |
| Spouse/husband/boyfriend | 3%                     | 15%                    |
| Authority figure         | 2%                     | 6%                     |

25  
26 263  
27 264  
28 265  
29 266  
30 267

**Table 3***Distribution of Attack Location within Age Group*

|                              | Child<br><i>n</i> =224 | Adult<br><i>n</i> =317 |
|------------------------------|------------------------|------------------------|
| Perpetrator's house          | 41%                    | 20%                    |
| Public                       | 28%                    | 48%                    |
| Survivor's house             | 23%                    | 23%                    |
| Other house                  | 7%                     | 6%                     |
| Survivor/perpetrator's house | 1%                     | 3%                     |

41  
42 268  
43 269  
44  
45  
46 270  
47  
48 271  
49  
50 272  
51  
52  
53 273  
54  
55 274  
56  
57  
58  
59  
60

We conducted preliminary analyses to identify which variables to enter into the model using Pearson's chi square tests for association. This allowed for testing whether the association between age group and each of the dichotomous variables was statistically significant. Only the variables that were significantly associated with age group were entered into the logistic regression model. To control for Type 1 errors, Bonferroni corrections were applied to the .05 alpha level (adjusted alpha = .008, with 6 variables). The strength of the relationship between the individual

275 offense characteristics was assessed using Cramer's V, which measures the magnitude of the  
 276 relationship between two categorical variables.<sup>21</sup> Values that fall between .41 and .60 were  
 277 interpreted as large, whereas values that fall between .20 and .40 were interpreted as moderate in  
 278 magnitude. Values smaller than .20 were regarded as associations small in magnitude. All analyses  
 279 were conducted using SPSS version 26.

280 Our data are freely available at: <https://osf.io/b9dzp/>.

## 281 RESULTS

282 Bivariate (chi square) analysis indicates that children compared to adults were less likely  
 283 to be female and less likely to be attacked by multiple perpetrators (Table 4). Regardless, both  
 284 child and adult victims were overwhelmingly female; 83% and 92%, respectively. Children were  
 285 also more likely to be attacked in a private location, by a known perpetrator and were more likely  
 286 to be attacked in the daytime. The associations between age and private location, and age and  
 287 multiple perpetrators was moderately large, whereas the strength of the other associations, while  
 288 statistically significant, was small in magnitude.

289 **Table 4**  
 290 *Comparisons between characteristics of sexual violence against children vs. adults: bivariate*  
 291 *analysis*

| Variable                             | Child<br>n=224 | Adult<br>n=317 | Pearson's $\chi^2$ | p     | Cramer's<br>V |
|--------------------------------------|----------------|----------------|--------------------|-------|---------------|
| Female victim                        | 83%            | 92%            | 11.41              | 0.001 | 0.145         |
| Male Perpetrator                     | 92%            | 94%            | 1.17               | 0.279 | 0.047         |
| Daytime Attack                       | 59%            | 44%            | 13.18              | <.001 | 0.156         |
| Private versus Public Location       | 66%            | 45%            | 21.55              | <.001 | 0.2           |
| Multiple Perpetrators                | 13%            | 31%            | 24.2               | <.001 | 0.212         |
| Known versus Stranger<br>Perpetrator | 76%            | 58%            | 17.86              | <.001 | 0.182         |

292

293 In the logistic regression model, the variables that were statistically significant from the  
 294 bivariate analysis (chi square results) were entered as predictors (i.e., female survivor, daytime  
 295 attack, private versus public location, multiple perpetrators, and known versus stranger  
 296 perpetrator), and the dependent variable was age group. The results are shown in Table 5. The  
 297 overall model was statistically significant,  $\chi^2(5, N = 541) = 53.3, p < .001$ . According to  
 298 Nagelkerke's  $R^2$ , 13% of the variability in age group was accounted for by the predictors in the  
 299 model. Child compared to adult survivors were 1.61 times more likely to be attacked during the  
 300 day, and 1.72 times more likely to be attacked in private as opposed to in public. Child compared  
 301 to adult survivors were also significantly less likely ( $OR=.458$ ) to be female, and less likely  
 302 ( $OR=.528$ ) to be attacked by multiple perpetrators.

303 **Table 5**  
 304 *Outputs of logistic regression by predictor variable*

|                                   | df | Estimate | SE   | Wald $\chi^2$ | <i>p</i> |
|-----------------------------------|----|----------|------|---------------|----------|
| Female victim                     | 1  | -0.782   | 0.29 | 7.3           | 0.007    |
| Daytime Attack                    | 1  | 0.474    | 0.19 | 6.5           | 0.011    |
| Private versus Public Location    | 1  | 0.543    | 0.21 | 6.96          | 0.008    |
| Multiple Perpetrators             | 1  | -0.638   | 0.27 | 5.77          | 0.016    |
| Known versus Stranger Perpetrator | 1  | 0.295    | 0.34 | 1.6           | 0.21     |

307 Tables 2 and 3 present a more detailed descriptive analysis of the child and adult cases on  
 308 the relationship between the perpetrator and the victim, and the locations in which the attacks took  
 309 place. As can be seen, age group was significantly associated with the relationship between the  
 310 perpetrator and the survivor,  $\chi^2(7, N = 541) = 107.84, p < .001$ . Children were most often  
 311 victimized by neighbours, followed by strangers and family members, whereas adults were most  
 312 often victimized by strangers followed by other types of perpetrators (customer, community  
 313 member, friend of a friend) and spouses. Age group was also significantly associated with attack

1  
2  
3 314 location,  $\chi^2(4, N = 541) = 35.59, p < .001$ . Children were most often attacked at the perpetrator's  
4  
5 315 house (41% of the cases), whereas adults were most often attacked in public locations (48% of  
6  
7  
8 316 cases).

## 10 317 **DISCUSSION**

### 12 318 **Summary of Key Findings**

15 319 We compared patterns of sexual violence committed against adults and children in Kenya  
16  
17 320 during the COVID-19 pandemic. The data arose from interviews conducted by human rights  
18  
19 321 defenders with survivors and describes the experiences of 541 survivors. We found that the  
20  
21 322 children in our sample were on average four years younger compared to national surveys of  
22  
23 323 children in Kenya.<sup>22, 23</sup> Further, compared to adults, children were more likely to be attacked  
24  
25 324 during the day, in private as opposed to public locations, by lone perpetrators, and by  
26  
27  
28 325 neighbours. In what follows, we discuss our findings in relation to existing research and draw  
29  
30  
31 326 implications for policy.

### 33 327 **Comparisons to Current Literature**

35 328 There were significant numbers of children in our sample, which is unsurprising, as  
36  
37 329 approximately half of GBV survivors are children during humanitarian crises. However, the  
38  
39 330 children in our sample were 12 years old on average, which is 4 years younger than the  
40  
41 331 nationally representative samples taken pre-pandemic.<sup>22, 23</sup> Our sample was not nationally  
42  
43 332 representative due to time and resource constraints, and it must also be noted that this violence  
44  
45 333 was occurring within a particular crisis and the consequences of other crises may be different.  
46  
47  
48 334 However, it is still notable that the child survivors in our sample were younger than previous  
49  
50 335 national samples have indicated. A recent study in Kenya noted that survivors who are being  
51  
52 336 seen in medical settings during the pandemic appear to be younger compared to before the  
53  
54  
55  
56  
57  
58  
59  
60

1  
2  
3 337 pandemic, speculating this is due to school closures during the pandemic.<sup>24</sup> Although SGBV,  
4  
5 338 such as domestic violence, has been linked to cases of domestic homicide in Kenya, there were  
6  
7  
8 339 no mortalities captured in our study sample.<sup>25</sup>  
9

10 340 We also found that children were 1.61 times more likely than adults to be attacked during  
11  
12 341 the day. This could be attributed to the way that children and adults were spending their time  
13  
14 342 during the pandemic. Because schools were closed, and there was no provision of any alternative  
15  
16 343 safe spaces, children may have been often left alone or under the care or supervision of  
17  
18  
19 344 neighbours or community members, which may have made them more vulnerable to attack in  
20  
21 345 some instances. Children were more likely to be attacked in private as compared to public  
22  
23 346 locations. Adults in our sample were about equally likely to be attacked during the day as at  
24  
25 347 night. Further, in keeping with previous research, significantly more adults were violated by  
26  
27  
28 348 multiple perpetrators in one attack compared to children.<sup>26</sup>  
29

30  
31 349 The proportion of boys in the child group was larger than the proportion of men in the  
32  
33 350 adult group. This may reflect differential rates of victimization for men compared to boys, as  
34  
35 351 boys are more vulnerable to assault than men due to their age. Another possible reason is that  
36  
37 352 sexual violence against men compared to boys is disclosed less often. The legal definition of rape  
38  
39 353 in Kenya, like many countries, requires ‘vaginal penetration’, which reinforces sociocultural  
40  
41  
42 354 notions that men cannot be sexually victimised.<sup>27</sup> Further, the tendency for people to believe that  
43  
44 355 the victimisation of men is harmless, coupled with self-blame and fear on the part of victims that  
45  
46 356 their community and family will react negatively towards them, discourage men from seeking  
47  
48  
49 357 help, and reporting sexual offenses to the police.<sup>28</sup>  
50

51 358 The children in our sample were more likely to be violated by someone they knew than a  
52  
53  
54 359 stranger. For adults, perpetrators were most likely to be strangers, followed by neighbours and  
55  
56  
57  
58  
59  
60

1  
2  
3 360 community members, and spouses. The most common perpetrators for children were neighbours,  
4  
5 361 followed by strangers, and family members. Adults were violated by strangers more frequently  
6  
7 362 because they were often attacked when the opportunity struck, such as while walking to or from  
8  
9 363 work, whereas children were violated by neighbours when they were left under their supervision  
10  
11 364 due to school closures and their parents' job requirements.<sup>29</sup> Children were attacked by  
12  
13 365 neighbours and in the perpetrators' houses at higher rates than adults. Although both groups were  
14  
15 366 more likely to be violated by someone they knew as opposed to a stranger, and in both groups  
16  
17 367 more than half of the perpetrators were known to the survivor, there is a high proportion of  
18  
19 368 stranger compared to known assailants in both age groups. There were several instances in our  
20  
21 369 data set in which neighbours invited children to use a computer or access the Internet, and then  
22  
23 370 assaulted them once they were inside the neighbour's residence.  
24  
25  
26  
27

### 28 371 **Strengths and Limitations**

29  
30 372 This research was conducted in partnership with frontline, survivor-led organisations,  
31  
32 373 using a prospective study design, which are key strengths. This enabled us to study sexual  
33  
34 374 violence systematically and rapidly in Kenya during the pandemic, even though there were  
35  
36 375 considerable physical distancing measures in place. Further, our data are unusually rich. The data  
37  
38 376 provide detailed information about survivors and perpetrators, where and when the incidents  
39  
40 377 occurred, which allowed for studying patterns of sexual violence. There are also several  
41  
42 378 limitations of our study to note. First, the sample was comprised of individuals who were seeking  
43  
44 379 help in accessing vital services. Hence, inferences about patterns nationally in Kenya cannot be  
45  
46 380 made because the data may not be representative. Further, our data do not provide information  
47  
48 381 about overall sexual violence trends in our study setting. Like many countries around the world,  
49  
50 382 sexual violence is underreported, and detailed, longitudinal information about sexual violence  
51  
52  
53  
54  
55  
56  
57  
58  
59  
60



1  
2  
3 383 incidents are lacking. Consequently, researchers struggle to make inferences about whether  
4  
5 384 patterns of violence are changing during COVID-19.<sup>30</sup> For example, the Demographic and  
6  
7 385 Health Survey in Kenya, which is a nationally representative survey of adults conducted every  
8  
9 386 five years, does not gather in-depth information about violations. For example, it does not collect  
10  
11 387 information about the time of day (or night) the attack occurred, if there were multiple  
12  
13 388 perpetrators involved in the attack, and if the attack took place in a public or private location.  
14  
15 389 Similarly, the national Violence Against Children Survey in Kenya, conducted in 2010 and 2019,  
16  
17 390 does not gather in depth information. We also had to rely on second-hand accounts from  
18  
19 391 guardians of sexual violence against children, owing to a lack of trained personnel and adequate  
20  
21 392 resources in Kenya for interviewing children. Some children were too young to be interviewed,  
22  
23 393 with the youngest victim being just seven-months old. Finally, our model better accounted for  
24  
25 394 patterns of violence against adults compared to children. This is because some of the factors we  
26  
27 395 analysed were more applicable to adults than children (e.g., employment, romantic relationships,  
28  
29 396 being alone in public).

### 35 397 **Recommendations and Conclusion**

36  
37 398 We urge policy makers to ensure that government COVID-19 emergency management  
38  
39 399 and recovery planning adequately addresses SGBV and that minimising the risk of additional  
40  
41 400 SGBV risk is integrated into national crisis policies. In particular, the results above suggest this  
42  
43 401 should include the provision of adequate alternative safe spaces and shelters when schools are  
44  
45 402 closed. Further, many communities have voluntarily-organised neighbourhood watch groups that  
46  
47 403 are focused on security issues, and these should be explicitly expanded and supported to monitor  
48  
49 404 and prevent SGBV. Community leaders have also said that there is a need for more social halls  
50  
51 405 – community facilities for holding meetings, which would enable screening educational films,  
52  
53  
54  
55  
56  
57  
58  
59

1  
2  
3 406 and other social activities. These structures can be a safe space for children and can be built  
4  
5 407 using constituency development funds, which each Member of Parliament in Kenya receives to  
6  
7 408 undertake projects that will address the urgent needs of their constituents.  
8  
9

10 409 Our results indicate the importance of high-quality and timely data in understanding and  
11  
12 410 thus combatting SGBV. We thus recommend governments invest in real-time data collection and  
13  
14 411 analysis systems to capture the evolving distribution of SGBV and to allow for the study of  
15  
16 412 regional trends. Data collection would allow authorities to identify crime hot spots and violations  
17  
18 413 being perpetrated by serial offenders, and to monitor the accessibility of vital services to help  
19  
20 414 ensure that survivors have support. This information is crucial in designing effective  
21  
22 415 interventions. For example, by knowing the location and time of attacks, there can be more  
23  
24 416 vigilance and awareness of SGBV against children. Additionally, this information can be used to  
25  
26 417 provide further education about SGBV against children and can highlight signs to look out for of  
27  
28 418 abuse. These interventions can be low cost, with communities mobilized to create such activities  
29  
30 419 with the help of university students, local NGOs, neighbourhood teachers, and religious  
31  
32 420 organizations. Police patrols and community initiatives could also be planned for times at which  
33  
34 421 SGBV rates peak to deter attacks and apprehend offenders. Further, the installation of street  
35  
36 422 lighting might deter perpetrators from attacking women and children. Another suggestion is to  
37  
38 423 establish a national sexual offender register in Kenya that would warn communities about high-  
39  
40 424 risk offenders. The collection of real-time data can also inform educational programs that  
41  
42 425 sensitize parents and children about community risks. These efforts must be survivor-centred,  
43  
44 426 involving survivors in the implementation and evaluation of the systems.  
45  
46  
47  
48  
49  
50

51 427 More generally, the results in this paper highlight the latent risk of SGBV, particularly for  
52  
53 428 women and girls. While its manifestation currently waxes and wanes dependent on the context,  
54  
55  
56  
57  
58  
59  
60

1  
2  
3 429 meaningful reductions in violence will require changing the narrative such that SGBV is  
4  
5 430 understood to be a crime, a gross violation of human rights, and that its pre-eminent importance  
6  
7 431 as a determinant of physical, emotional, and mental health is reflected in national and county  
8  
9 432 budgets. Funding for programming, interventions, and research should be included.  
10  
11

12 433 High rates of SGBV also necessitate adequate protection for the needs of survivors. To  
13  
14 434 this end, the national government has approved the use of the National Government Affirmative  
15  
16 435 Fund to facilitate the establishment of safe spaces/shelters in all 47 counties to ensure survivors'  
17  
18 436 safety and security is safe guarded. However, advocacy is required to ensure the funds are  
19  
20 437 directed appropriately.  
21  
22

23  
24 438 The implementation of emergency referral pathways that enable survivors to access  
25  
26 439 comprehensive care and support services should be enacted by government. Curfews and other  
27  
28 440 social distancing regulations need to include SGBV response mechanisms to ensure the  
29  
30 441 continued availability and accessibility of services for survivors. Further, the medico-legal  
31  
32 442 response to SGBV can be strengthened by expediting restraining orders and prosecutions, and by  
33  
34 443 establishing 'one-stop' centres to allow survivors to access essential services, and authorities to  
35  
36 444 collect evidence, all in one location. This would also facilitate the preservation of evidence and  
37  
38 445 protection of survivors to facilitate access to justice.  
39  
40  
41

42 446  
43  
44

45 447

46 448

47 449

48 450

49 451  
50

51 452  
52  
53  
54  
55  
56  
57  
58  
59  
60

1  
2  
3 453

## Declarations

### 454 Authors' Contributions

455 HF and WK conceptualized and designed the data collection methods utilized in this project. SR  
456 and LMS drafted the protocol which was then reviewed by HF, MC, JCR, and LMS. HF, SR and  
457 LMS analysed the data. HF, SR, LMS, JCR, MC, LLS, JR, WK, JC, DN, and CK contributed to  
458 and reviewed the draft version of the manuscript and approved the final version.

### 460 Non-author Contributors

461 The data were made possible by the efforts of the Survivors of Sexual Violence in Kenya and the  
462 Community Justice Centre who collected the information we analysed as part of their work in  
463 caring for survivors.

### 465 Competing interests

466 The authors declare that they have no competing interests.

### 468 Funding

469 This research was funded by ESRC Grant ES/T010207/1 (to H.D.F., M.F.C., J.C.R. and the  
470 Wangu Kanja Foundation) and AHRC Grant AH/T008091/1 (to H.D.F. and the Wangu Kanja  
471 Foundation), the Institute for Global Innovation, University of Birmingham (to H.D.F, and  
472 W.K.F.), and a research grant from the Ring for Peace Foundation (to L.S.).

### 474 Ethics

475 This research was approved by the University of Birmingham Science, Technology, Engineering,  
476 and Mathematics Ethics Committee (ERN\_19-0183).

### 478 Availability of data and materials

479 All data generated during this study will be included in the published scoping review and will  
480 also be made available upon request.

481

482

483

484

485

486

487

488

489

490

491

492

493

494

495

496

56

57

58

59

60

1  
2  
3  
4  
5  
6  
7  
8  
9  
10  
11  
12  
13  
14  
15  
16  
17  
18  
19  
20  
21  
22  
23  
24  
25  
26  
27  
28  
29  
30  
31  
32  
33  
34  
35  
36  
37  
38  
39  
40  
41  
42  
43  
44  
45  
46  
47  
48  
49  
50  
51  
52  
53  
54  
55  
56  
57  
58  
59  
60

**Acknowledgements**

We are grateful to the many, necessarily anonymous, human rights defenders who continue to work with survivors in difficult and dangerous conditions in Kenya.

For peer review only

## References

1. Odhiambo A. "They Were Men in Uniform" Sexual Violence Against Women and Girls in Kenya's 2017 Elections USA: Human Rights Watch 2017.
2. World Health Organization. Violence against women who.int: World Health Organization; 2021 [Available from: <https://www.who.int/news-room/fact-sheets/detail/violence-against-women>.]
3. Ministry of Health. First Case of Coronavirus Disease Confirmed in Kenya: Ministry of Health; 2020 [Available from: <https://www.health.go.ke/first-case-of-coronavirus-disease-confirmed-in-kenya/#:~:text=The%20Ministry%20of%20Health%20has,in%20China%20in%20December%202019.>]
4. Ritchie H, Ortiz-Ospina E, Beltekian D, Mathieu E, Hasell J, Macdonald B, et al. Kenya: Coronavirus Pandemic Country Profile ourworldindata.org: ourworldindata.org; 2020 [Available from: <https://ourworldindata.org/coronavirus/country/Kenya>]
5. Flowe H, Rockowitz S, Rockey J, Kanja W. Sexual and Other Forms of Violence During the COVID-19 Pandemic Emergency in Kenya. The University of Birmingham 2020.
6. Bearak M, Ombuor R. Kenya's coronavirus curfew begins with wave of police crackdowns. The Washington Post. 2020.
7. Marsh M, Purdin S, Navani S. Addressing sexual violence in humanitarian emergencies. *Glob Public Health*. 2006;1(2):133-46. doi: 10.1080/17441690600652787
8. Dara Kay C, Ragnhild N. Sexual violence in armed conflict: Introducing the SVAC dataset, 1989–2009. *Journal of peace research*. 2014;51(3):418-28. doi:10.1177/0022343314523028
9. Sloan E, Killion C, Yarandi H, Sharps P, Lewis-O'Connor A, Hassan M, et al. Experiences of violence and abuse among internally displaced adolescent girls following a natural disaster. *J Adv Nurs*. 2017;73(12):3200-8. doi: 10.1111/jan.13316
10. Harvard Humanitarian Initiative, Open Society Institute.. *Characterizing Sexual Violence in the Democratic Republic of the Congo: Profiles of Violence, Community Responses, and Implications for the Protection of Women*. Cambridge, MA: Harvard University 2009.
11. Guterres A. *Conflict Related Sexual Violence: Report of the United Nations Secretary General*. United Nations; 2019.
12. O'Brien M, Tolosa MX. The effect of the 2014 West Africa Ebola virus disease epidemic on multi-level violence against women. *International journal of human rights in healthcare*. 2016;9(3):151-60. doi: 10.1108/ijhrh-09-2015-0027
13. Schwartz DA, Anoko JN, Abramowitz SA. *Pregnant in the Time of Ebola Women and Their Children in the 2013-2015 West African Epidemic [text]*. Cham: Springer International Publishing : Imprint: Springer,; 2019. doi: 10.1007/978-3-319-97637-2
14. Chandan JS, Taylor J, Bradbury - Jones C, Nirantharakumar K, Kane E, Bandyopadhyay S. COVID-19: a public health approach to manage domestic violence is needed. *The Lancet Public Health*. 2020;5(6). doi:[10.1016/S2468-2667\(20\)30112-2](https://doi.org/10.1016/S2468-2667(20)30112-2)
15. Mittal S, Singh T. Gender-Based Violence During COVID-19 Pandemic: A Mini-Review. *Frontiers in Global Women's Health*. 2020;1(4). doi: 10.3389/fgwh.2020.00004
16. Bradbury-Jones C, Isham L. The pandemic paradox: The consequences of COVID-19 on domestic violence. *J Clin Nurs*. 2020;29(13-14):2047-9. doi: 10.1111/jocn.15296

- 1  
2  
3 555 17. UNFPA. Millions more cases of violence, child marriage, female genital mutilation,  
4 556 unintended pregnancy expected due to the COVID-19 pandemic 2020 [Available from:  
5 557 <https://www.unfpa.org/news/millions-more-cases-violence-child-marriage-female-genital->  
6 558 [mutilation-unintended-pregnancies.](https://www.unfpa.org/news/millions-more-cases-violence-child-marriage-female-genital-)
- 8 559 18. Onyango M, Resnick K, Davis A, Shah R. Gender-Based Violence Among Adolescent  
9 560 Girls and Young Women: A Neglected Consequence of the West African Ebola Outbreak:  
10 561 Medical, Anthropological, and Public Health Perspectives. 2019. p. 121-32. doi: 10.1007/978-3-  
11 562 319-97637-2\_8
- 12 563 19. Giannini S, Albrechtsen AB. Covid-19 school closures around the world will hit girls  
13 564 hardest [unesco.org](https://unesco.org/); UNESCO; 2020
- 15 565 20. The Data Protection Act, 24 (2019). [Available from:  
16 566 [http://kenyalaw.org/kl/fileadmin/pdfdownloads/Acts/2019/TheDataProtectionAct\\_\\_No24of2019.](http://kenyalaw.org/kl/fileadmin/pdfdownloads/Acts/2019/TheDataProtectionAct__No24of2019.pdf)  
17 567 [pdf\]](http://kenyalaw.org/kl/fileadmin/pdfdownloads/Acts/2019/TheDataProtectionAct__No24of2019.pdf)
- 18 568 21. McHugh ML. The chi-square test of independence. *Biochem Med (Zagreb)*.  
19 569 2013;23(2):143-9. doi: 10.11613/BM.2013.018
- 21 570 22. Kenya Ministry of Health, Kenya National Bureau of Statistics, National AIDS Control  
22 571 Council, Kenya Medical Research Institute, National Council for Population and Developmen.  
23 572 Kenya demographic and health survey, 20142015.
- 24 573 23. Ministry of Labour and Social Protection Kenya. Violence against Children in Kenya:  
25 574 Findings from a National Survey, 2019. Kenya; 2019.
- 26 575 24. Johnson K, Green L, Volpellier M, Kidenda S, McHale T, Naimer K, Mishori R. The  
27 576 impact of COVID-19 on services for people affected by sexual and gender-based violence. *Int J*  
28 577 *Gynaecol Obstet*. 2020;150(3):285-287. doi: [10.1002/ijgo.13285](https://doi.org/10.1002/ijgo.13285)
- 30 578 25. Mungai C. Domestic Violence in Kenya: Stop Blaming Women Cambridge, MA:  
31 579 Nieman Foundation; 2019.
- 32 580 26. Edinburgh L, Pape-Blabolil J, Harpin SB, Saewyc E. Multiple perpetrator rape among  
33 581 girls evaluated at a hospital-based Child Advocacy Center: Seven years of reviewed cases. *Child*  
34 582 *Abuse Negl*. 2014;38(9):1540-51. doi: 10.1016/j.chiabu.2014.05.008
- 35 583 27. Bullock CM, Mace B. Male Victims of Sexual Assault: Phenomenology, Psychology,  
36 584 Physiology. *J Am Acad Psychiatry Law*. 2011;39(2):197-205.
- 38 585 28. Hlavka HR. Speaking of Stigma and the Silence of Shame: Young Men and Sexual  
39 586 Victimization. *Men and Masculinities*. 2017;20(4):482-505. doi: 10.1177/1097184x16652656
- 40 587 29. Simba H, Ngcobo S. Are Pandemics Gender Neutral? Women's Health and COVID-19.  
41 588 *Frontiers in Global Women's Health*. 2020;1(8). doi: 10.3389/fgwh.2020.570666
- 42 589 30. Chelangat N, Kipyego E, Kimani S, Aseka L, Munyao M, Amimo S. Trapped within a  
43 590 lockdown: understanding sexual and gender-based violence during the Covid-19 period.  
44 591 Nairobi: Professional Criminologists Association of Kenya; 2020.
- 46 592

**SURVIVORS DATA COLLECTION INTAKE SUMMARY FORM**

- 1  
2  
3  
4  
5  
6  
7
- 8 a. Date of incident: Time of incident:  
9 b. Age of survivor: Sex:  
10 c. Location(s) of incident:  
11 • Survivor's house: **Yes/No**  
12 • Other's house: **Yes/No**  
13 • Place of Work: **Yes/No/I don't know**  
14 • Perpetrator's house: **Yes/No/I don't know**  
15 • On my way to work/ On the road: **Yes/No/I don't know**  
16 • Other location (please describe): **Yes/No/I don't know**  
17  
18 d. Name of the city/town/village where the incident took place:  
19 e. Brief description of the incident:  
20  
21  
22  
23  
24  
25  
26  
27  
28  
29  
30  
31  
32  
33  
34  
35  
36  
37  
38  
39 f. Perpetrator's Information: -  
40 • Number of perpetrator(s): - Do you know the perpetrator(s): -  
41 • If Yes, How  
42 • What is the gender: - Age of the perpetrator: -  
43 g. Post Incident Information: -  
44 • What action did the survivor take after the incident?  
45 a. Seek medical attention: **Yes/No**  
46 b. Seek counselling: **Yes/No**  
47 c. Report to the police: **Yes/No**  
48 d. Seek legal redress: **Yes/No**  
49 e. Protection/Safe space/Shelter: **Yes/No**  
50  
51 h. If the survivor sought medical attention for the incident:  
52 a. Did they become HIV positive due to the incident? **Yes/No/I don't know**  
53 b. Did you get pregnant due to the incident? **Yes/No/I don't know**  
54 c. Did you contract any STI's due to the incident? **Yes/No/I don't know**  
55 d. Were you physically injured due to the incident? **Yes/No/I don't know**  
56  
57 i. Was the survivor referred to the WKF? Yes/No If **YES**: Client's Ref. No:  
58  
59  
60



1  
2  
3  
4  
5  
6  
7  
8  
9  
10  
11  
12  
13  
14  
15  
16  
17  
18  
19  
20  
21  
22  
23  
24  
25  
26  
27  
28  
29  
30  
31  
32  
33  
34  
35  
36  
37  
38  
39  
40  
41  
42  
43  
44  
45  
46  
47  
48  
49  
50  
51  
52  
53  
54  
55  
56  
57  
58  
59  
60STROBE Statement—Checklist of items that should be included in reports of *cross-sectional studies*

|                              | Item No | Recommendation                                                                                                                                                                                                                                                                                                                                                                      |
|------------------------------|---------|-------------------------------------------------------------------------------------------------------------------------------------------------------------------------------------------------------------------------------------------------------------------------------------------------------------------------------------------------------------------------------------|
| <b>Title and abstract</b>    | 1       | (a) Indicate the study's design with a commonly used term in the title or the abstract<br>9<br>(b) Provide in the abstract an informative and balanced summary of what was done and what was found 40-64                                                                                                                                                                            |
| <b>Introduction</b>          |         |                                                                                                                                                                                                                                                                                                                                                                                     |
| Background/rationale         | 2       | Explain the scientific background and rationale for the investigation being reported<br>97-152                                                                                                                                                                                                                                                                                      |
| Objectives                   | 3       | State specific objectives, including any prespecified hypotheses 153-171                                                                                                                                                                                                                                                                                                            |
| <b>Methods</b>               |         |                                                                                                                                                                                                                                                                                                                                                                                     |
| Study design                 | 4       | Present key elements of study design early in the paper 174-177                                                                                                                                                                                                                                                                                                                     |
| Setting                      | 5       | Describe the setting, locations, and relevant dates, including periods of recruitment, exposure, follow-up, and data collection 190-193                                                                                                                                                                                                                                             |
| Participants                 | 6       | (a) Give the eligibility criteria, and the sources and methods of selection of participants 190-193                                                                                                                                                                                                                                                                                 |
| Variables                    | 7       | Clearly define all outcomes, exposures, predictors, potential confounders, and effect modifiers. Give diagnostic criteria, if applicable Table 1 (line 186)                                                                                                                                                                                                                         |
| Data sources/<br>measurement | 8*      | For each variable of interest, give sources of data and details of methods of assessment (measurement). Describe comparability of assessment methods if there is more than one group 208-215, Table 1 for methods of assessment                                                                                                                                                     |
| Bias                         | 9       | Describe any efforts to address potential sources of bias NA                                                                                                                                                                                                                                                                                                                        |
| Study size                   | 10      | Explain how the study size was arrived at 190-206                                                                                                                                                                                                                                                                                                                                   |
| Quantitative variables       | 11      | Explain how quantitative variables were handled in the analyses. If applicable, describe which groupings were chosen and why 198-200, 244-255                                                                                                                                                                                                                                       |
| Statistical methods          | 12      | (a) Describe all statistical methods, including those used to control for confounding<br>244-281, 284-290<br>(b) Describe any methods used to examine subgroups and interactions NA<br>(c) Explain how missing data were addressed 201<br>(d) If applicable, describe analytical methods taking account of sampling strategy<br>244-281<br>(e) Describe any sensitivity analyses NA |
| <b>Results</b>               |         |                                                                                                                                                                                                                                                                                                                                                                                     |
| Participants                 | 13*     | (a) Report numbers of individuals at each stage of study—eg numbers potentially eligible, examined for eligibility, confirmed eligible, included in the study, completing follow-up, and analysed 190-206<br>(b) Give reasons for non-participation at each stage NA<br>(c) Consider use of a flow diagram NA                                                                       |
| Descriptive data             | 14*     | (a) Give characteristics of study participants (eg demographic, clinical, social) and information on exposures and potential confounders 190-197<br>(b) Indicate number of participants with missing data for each variable of interest<br>201                                                                                                                                      |
| Outcome data                 | 15*     | Report numbers of outcome events or summary measures Tables 2-4                                                                                                                                                                                                                                                                                                                     |
| Main results                 | 16      | (a) Give unadjusted estimates and, if applicable, confounder-adjusted estimates and their precision (eg, 95% confidence interval). Make clear which confounders were adjusted for and why they were included NA                                                                                                                                                                     |

(b) Report category boundaries when continuous variables were categorized 198-200

(c) If relevant, consider translating estimates of relative risk into absolute risk for a meaningful time period NA

|                          |    |                                                                                                                                                                                    |
|--------------------------|----|------------------------------------------------------------------------------------------------------------------------------------------------------------------------------------|
| Other analyses           | 17 | Report other analyses done—eg analyses of subgroups and interactions, and sensitivity analyses NA                                                                                  |
| <b>Discussion</b>        |    |                                                                                                                                                                                    |
| Key results              | 18 | Summarise key results with reference to study objectives 321-328                                                                                                                   |
| Limitations              | 19 | Discuss limitations of the study, taking into account sources of potential bias or imprecision. Discuss both direction and magnitude of any potential bias 374-398                 |
| Interpretation           | 20 | Give a cautious overall interpretation of results considering objectives, limitations, multiplicity of analyses, results from similar studies, and other relevant evidence 330-372 |
| Generalisability         | 21 | Discuss the generalisability (external validity) of the study results 400-428                                                                                                      |
| <b>Other information</b> |    |                                                                                                                                                                                    |
| Funding                  | 22 | Give the source of funding and the role of the funders for the present study and, if applicable, for the original study on which the present article is based 478-481              |

\*Give information separately for exposed and unexposed groups.

**Note:** An Explanation and Elaboration article discusses each checklist item and gives methodological background and published examples of transparent reporting. The STROBE checklist is best used in conjunction with this article (freely available on the Web sites of PLoS Medicine at <http://www.plosmedicine.org/>, Annals of Internal Medicine at <http://www.annals.org/>, and Epidemiology at <http://www.epidem.com/>). Information on the STROBE Initiative is available at [www.strobe-statement.org](http://www.strobe-statement.org).
