# Supplementary material for: Patterns of sexual violence against adults and children during the COVID-19 pandemic in Kenya: a prospective cross-sectional study
Source: BMJ Open. 2021 Sep 6;11(9):e048636. doi: 10.1136/bmjopen-2021-048636 (PMC8423516; doi:10.1136/bmjopen-2021-048636)
Supplement: Supplementary data [file bmjopen-2021-048636supp001.pdf]

a. Date of incident: \_\_\_\_\_ Time of incident: \_\_\_\_\_

b. Age of survivor: \_\_\_\_\_ Sex: \_\_\_\_\_

c. Location(s) of incident: \_\_\_\_\_

- Survivor's house: **Yes/No**
- Other's house: **Yes/No**
- Place of Work: **Yes/No/I don't know**
- Perpetrator's house: **Yes/No/I don't know**
- On my way to work/ On the road: **Yes/No/I don't know**
- Other location (please describe): \_\_\_\_\_ **Yes/No/I don't know**

d. Name of the city/town/village where the incident took place: \_\_\_\_\_

e. Brief description of the incident: \_\_\_\_\_

- Rockowitz S, *et al.* *BMJ Open* 2022; 11:e048636. doi: 10.1136/bmjopen-2021-048636
